# Supplementary material for: Population-level impact, herd immunity, and elimination after human papillomavirus vaccination: a systematic review and meta-analysis of predictions from transmission-dynamic models
Source: PubMed Central journal article supplement — Lancet Public Health. Author manuscript; Available in PMC 2019 Sep 5. (PMC6727207; doi:10.1016/s2468-2667(16)30001-9), 2016-09-27
Supplement: NIHMS1048643-supplement-Supplement.pdf [file NIHMS1048643-supplement-Supplement.pdf]

## Supplementary appendix

This appendix formed part of the original submission and has been peer reviewed. We post it as supplied by the authors.

Supplement to: Brisson M, Bénard E, Drolet M, et al. Population-level impact, herd immunity, and elimination after human papillomavirus vaccination: a systematic review and meta-analysis of predictions from transmission-dynamic models. *Lancet Public Health* 2016; published online Sept 27. [http://dx.doi.org/10.1016/S2468-2667\(16\)30001-9](http://dx.doi.org/10.1016/S2468-2667(16)30001-9).

## Table S1. Search strategy

### Pubmed Search :

("models, theoretical"[mesh] OR "theoretical models"[tiab] OR "mathematical model"[tiab] OR "models, statistical" [mesh] OR "cost-benefit analysis"[mesh] OR "cost-effectiveness"[tiab] OR "risk-benefit analysis"[tiab]) AND ("papillomavirus vaccines"[mesh] OR "papillomavirus vaccination"[tiab] OR "human papillomavirus vaccine"[tiab] OR "HPV vaccine"[tiab] OR "HPV vaccination"[tiab]) NOT ("developing countries"[mesh] OR "Poverty"[Mesh] OR "HIV infections"[mesh] OR "HIV infections"[tiab] OR "HIV"[mesh] OR "Models, Animal"[mesh] OR "Patient Acceptance of Health Care"[Mesh] OR "health education"[mesh] OR "Clinical Trial" [Publication Type])

### Embase Search :

'wart virus vaccine'/exp OR 'hpv vaccine':ti OR 'hpv vaccination':ti OR 'papillomavirus vaccine':ti OR 'papillomavirus vaccination':ti AND ('theoretical model'/exp OR 'computer simulation'/exp OR 'risk benefit analysis'/exp OR 'mathematical model'/exp OR 'cost effectiveness analysis'/exp OR 'cost benefit analysis'/exp) NOT ('parent counseling'/exp OR 'parent consent'/exp OR 'parent'/exp OR 'parental attitude'/exp OR 'human immunodeficiency virus infection'/exp OR 'health education'/exp OR 'attitude to health'/exp OR 'developing country'/exp OR 'low income country'/exp OR 'lowest income group'/exp OR 'nonhuman'/exp OR 'clinical study'/exp)

**Table S2. Description of the 19 pre-determined HPV vaccination scenarios**

|                                                                                                           | Vaccination coverage |     |     |     |     |      |
|-----------------------------------------------------------------------------------------------------------|----------------------|-----|-----|-----|-----|------|
|                                                                                                           | 0%                   | 20% | 40% | 60% | 80% | 100% |
| <b>NO VACCINATION</b>                                                                                     | x                    |     |     |     |     |      |
| <hr style="border-top: 1px dashed black;"/>                                                               |                      |     |     |     |     |      |
| <b>BASE CASE</b><br><i>(vaccine efficacy=100% ; duration of vaccine protection=Life)</i>                  |                      |     |     |     |     |      |
| Girls-Only                                                                                                |                      | x   | x   | x   | x   | x    |
| Girls&Boys                                                                                                |                      | x   | x   | x   | x   | x    |
| <hr style="border-top: 1px dashed black;"/>                                                               |                      |     |     |     |     |      |
| <b>SENSITIVITY ANALYSIS 1</b><br><i>(vaccine efficacy=100% ; duration of vaccine protection=20 years)</i> |                      |     |     |     |     |      |
| Girls-Only                                                                                                |                      |     | x   |     | x   |      |
| Girls&Boys                                                                                                |                      |     | x   |     | x   |      |
| <hr style="border-top: 1px dashed black;"/>                                                               |                      |     |     |     |     |      |
| <b>SENSITIVITY ANALYSIS 2</b><br><i>(vaccine efficacy=90% ; duration of vaccine protection=Life)</i>      |                      |     |     |     |     |      |
| Girls-Only                                                                                                |                      |     | x   |     | x   |      |
| Girls&Boys                                                                                                |                      |     | x   |     | x   |      |

**Table S3. Characteristics of the models included in the systematic review and meta-analysis**

| Corresponding Author (Country)          | Model type                                             | Model stratification (risk groups) | HPV types included                                                                | Partnership formation & dissolution | Transmission probability                                  | Proportion that develop natural immunity & duration of natural immunity                   | Baseline HPV16 prevalence (15-24 yrs) | Model with cervical cancer | Vaccine efficacy (VE) parameters*†                                                | Outcomes used for Model calibration                     |
|-----------------------------------------|--------------------------------------------------------|------------------------------------|-----------------------------------------------------------------------------------|-------------------------------------|-----------------------------------------------------------|-------------------------------------------------------------------------------------------|---------------------------------------|----------------------------|-----------------------------------------------------------------------------------|---------------------------------------------------------|
| Baussano <sup>1,2</sup> (Italy)         | Deterministic                                          | Age, gender, sexual activity       | Individual: 16, 18, 31, 33, 45, 52, 58, 35, 39, 51, 56, 59, 68                    | Instantaneous                       | Per partnership                                           | Proportion: 24% (HPV16)<br>44% (HPV18)<br>Duration: lifelong                              | W : 5.5%<br>M : 5.4%                  | No                         | - Take<br>- Waning of VE (function of age and time since vaccination)             | - HPV prevalence                                        |
| Bogaards <sup>3-7</sup> (Netherlands)   | Deterministic transmission, otherwise individual-based | Age, gender, sexual activity       | Individual: 16, 18, 31, 33, 45, 52, 58 and 7 other types                          | Instantaneous                       | Per partnership                                           | Proportion: 100%<br>Duration, mean : 24 yrs (HPV16)<br>34 yrs (HPV18)                     | W : 5.2%<br>M : 2.0%                  | Yes                        | - Take<br>- Waning of VE (protection for x yrs & abrupt end or constant rate)     | - Sexual activity<br>- HPV prevalence                   |
| Brisson <sup>8-14</sup> (Canada)        | Stochastic and individual-based                        | Age, gender, sexual activity       | Individual: 6, 11, 16, 18, 31, 33, 45, 52, 58, 35, 39, 51, 56, 59, 66, 68, 73, 82 | Duration of partnership             | Per act                                                   | Proportion: 14-84% (women)<br>0-64% (men)<br>Duration: lifelong                           | W : 5.6%<br>M : 5.2%                  | Yes                        | - Take<br>- Degree<br>- Waning of VE (normal distribution)                        | - Sexual activity<br>- HPV prevalence                   |
| Burger <sup>15-19</sup> (Norway)        | Deterministic                                          | Age, gender, sexual activity       | Individual: 16, 18                                                                | Instantaneous                       | Per partnership                                           | Proportion: Women 88% (HPV16)<br>87% (HPV18)<br>Men 11% (HPV16, 18)<br>Duration: lifelong | W : 9.7%<br>M : 4.5%                  | Yes                        | - Degree<br>- Waning of VE (protection for x yrs then % lost each year)           | - HPV prevalence                                        |
| Canfell <sup>20-22,23</sup> (Australia) | Deterministic                                          | Age, gender, sexual activity       | Individual: 16,18<br>Grouped: other HR types                                      | Instantaneous                       | Per partnership                                           | Proportion: 100%<br>Duration, mean: 5-100 yrs                                             | W : 7.9%<br>M : 5.5%                  | Yes                        | - Take<br>- Degree<br>- Waning of VE (protection for x yrs then % lost each year) | - Sexual activity<br>- HPV prevalence                   |
| Chesson <sup>24,25</sup> (USA)          | Deterministic                                          | Age, gender                        | Individual: 16,18<br>Grouped: 6/11                                                | NA                                  | Age, and HPV-type-specific probability of HPV acquisition | Proportion: 100%<br>Duration: lifelong                                                    | W : 6.2%<br>M : 6.2%                  | No                         | - Degree<br>- No waning                                                           | - NA. Direct parameters in the model                    |
| De Blasio <sup>26</sup> (Norway)        | Deterministic                                          | Age, gender, sexual activity       | Individual: 6, 11, 16, 18<br>Grouped: 10 other HR types                           | Instantaneous                       | Per partnership                                           | Proportion: 100%<br>Duration, mean: 15 years                                              | W : 8.7%<br>M : 8.2%                  | Yes                        | - Take<br>- Waning of VE (constant rate)                                          | - Sexual activity<br>- HPV prevalence                   |
| Elbasha <sup>27,28</sup> (USA)          | Deterministic                                          | Age, gender, sexual activity       | Individual: 16, 18, 6, 11, 31, 33 45, 52, 58                                      | Instantaneous                       | Per partnership                                           | Proportion: 60%<br>Duration: lifelong                                                     | W : 3.9%<br>M : 3.0%                  | Yes                        | - Degree<br>- Waning of VE (constant rate)                                        | - Indirectly from cervical cancer and AGW consultations |
| Guzzetta <sup>29</sup> (Italy)          | Deterministic                                          | Age, gender, sexual activity       | Grouped: 16/18                                                                    | Instantaneous                       | Per partnership                                           | Proportion: 47%<br>Duration: lifelong                                                     | W : 3.0%<br>M : 3.4%                  | Yes                        | - Take<br>- Waning of VE (constant                                                | - Sexual activity<br>- HPV prevalence                   |

| Corresponding Author (Country)          | Model type                      | Model stratification (risk groups) | HPV types included                                                                                             | Partnership formation & dissolution | Transmission probability | Proportion that develop natural immunity & duration of natural immunity | Baseline HPV16 prevalence (15-24 yrs) | Model with cervical cancer | Vaccine efficacy (VE) parameters*†                                                     | Outcomes used for Model calibration                      |
|-----------------------------------------|---------------------------------|------------------------------------|----------------------------------------------------------------------------------------------------------------|-------------------------------------|--------------------------|-------------------------------------------------------------------------|---------------------------------------|----------------------------|----------------------------------------------------------------------------------------|----------------------------------------------------------|
| Jepsen <sup>30,31</sup> (Ireland)       | Stochastic and individual-based | Age, gender                        | Individual: 16, 18                                                                                             | Duration of partnership             | Per act                  | No natural immunity                                                     | W : NA <sup>††</sup><br>M : NA        | Yes                        | rate)<br>- Take<br>- Waning of VE (protection for x yrs & abrupt end or constant rate) | - Sexual activity<br>- HPV prevalence<br>- HPV incidence |
| Jit <sup>32,34</sup> (United Kingdom)   | Deterministic                   | Age, gender, sexual activity       | Individual: 16, 18<br>Grouped: 31/33/39/45/51/52/56/58/59/68                                                   | Instantaneous                       | Per partnership          | Proportion: 96%<br>Duration, mean: 20 yrs                               | W : 7.2%<br>M : 5.9%                  | Yes                        | - Take<br>- Waning of VE (protection for x yrs & abrupt end or constant rate)          | - Sexual activity<br>- HPV prevalence                    |
| Matthijssse <sup>35</sup> (Netherlands) | Stochastic and individual-based | Age, gender, sexual activity       | Individual: 16, 18                                                                                             | Duration of partnership             | Per act                  | Proportion: 100%<br>Duration, mean: 112 yrs (HPV16)<br>43 yrs (HPV18)   | W : 4.2%<br>M : 5.3%                  | No                         | - Degree<br>- No waning                                                                | - Sexual activity<br>- HPV prevalence                    |
| Mikolajczyk <sup>36</sup> (Germany)     | Deterministic                   | Age, gender, sexual activity       | Individual: 16, 18<br>Grouped: 6/11 <sup>‡</sup> ,<br>Other HR cross-protective, Other HR not cross-protective | Instantaneous                       | Per act                  | Proportion: 18%<br>Duration, mean: 10 yrs                               | W : 6.9%<br>M : 6.4%                  | Yes                        | - Take<br>- Waning of VE (protection for x yrs then % lost each year)                  | - HPV prevalence                                         |
| Tully <sup>37</sup> (Canada)            | Deterministic                   | Age, gender                        | Grouped: 16/18                                                                                                 | Instantaneous                       | Per partnership          | Proportion: 100%<br>Duration, mean: 2.5 yrs                             | W : 7.0%<br>M : 5.3%                  | Yes                        | - Take<br>- Waning of VE (constant rate)                                               | - HPV prevalence<br>- HPV incidence                      |
| Turner <sup>38</sup> (United Kingdom)   | Deterministic                   | Age, gender, sexual activity       | Individual: 16, 18<br>Grouped: 10 other HR types                                                               | Duration of partnership             | Per partnership          | Proportion: 25, 50, 75, 100%<br>Duration, mean: 2, 10, 20 yrs, lifelong | W : 8.1%<br>M : 10.2%                 | Yes                        | - Take<br>- Waning of VE (constant rate)                                               | - Sexual activity<br>- HPV prevalence                    |
| Vänskä <sup>39</sup> (Finland)          | Deterministic                   | Age, gender, sexual activity       | Individual: 16, 18, 31, 33, 45, 52, 58, 39, 51, 56, 59, 66, 68                                                 | Instantaneous                       | Per partnership          | Proportion: 100%<br>Duration, mean: 27 yrs                              | W : 8.5%<br>M : 7.7%                  | No                         | - Take<br>- Waning of VE (protection for x yrs then % lost each year)                  | - Sexual activity<br>- HPV prevalence                    |

HR: High-risk; LR: Low-risk; VE: Vaccine efficacy; W: women; M: Men; NA: Not provided by the authors.

\* Take: probability that a vaccinated individual develops immunity; Degree: degree of protection against infection per act or partnership;

† Waning: some models can reproduce different waning functions. We present all of the model's waning functions.

†† Jepsen provided prevalence for all age groups, but not for 15-24 year olds.

‡ Mikolajczyk model the impact of HPV6 and HPV11 separately but use the same parameters for both types

**Figure S1. Predicted Relative reductions in the prevalence of HPV16, HPV18, HPV6, and HPV11 infections among women and men, after 70 years of Girls-Only or Girls&Boys vaccination.**

**A) Women, 40% coverage**

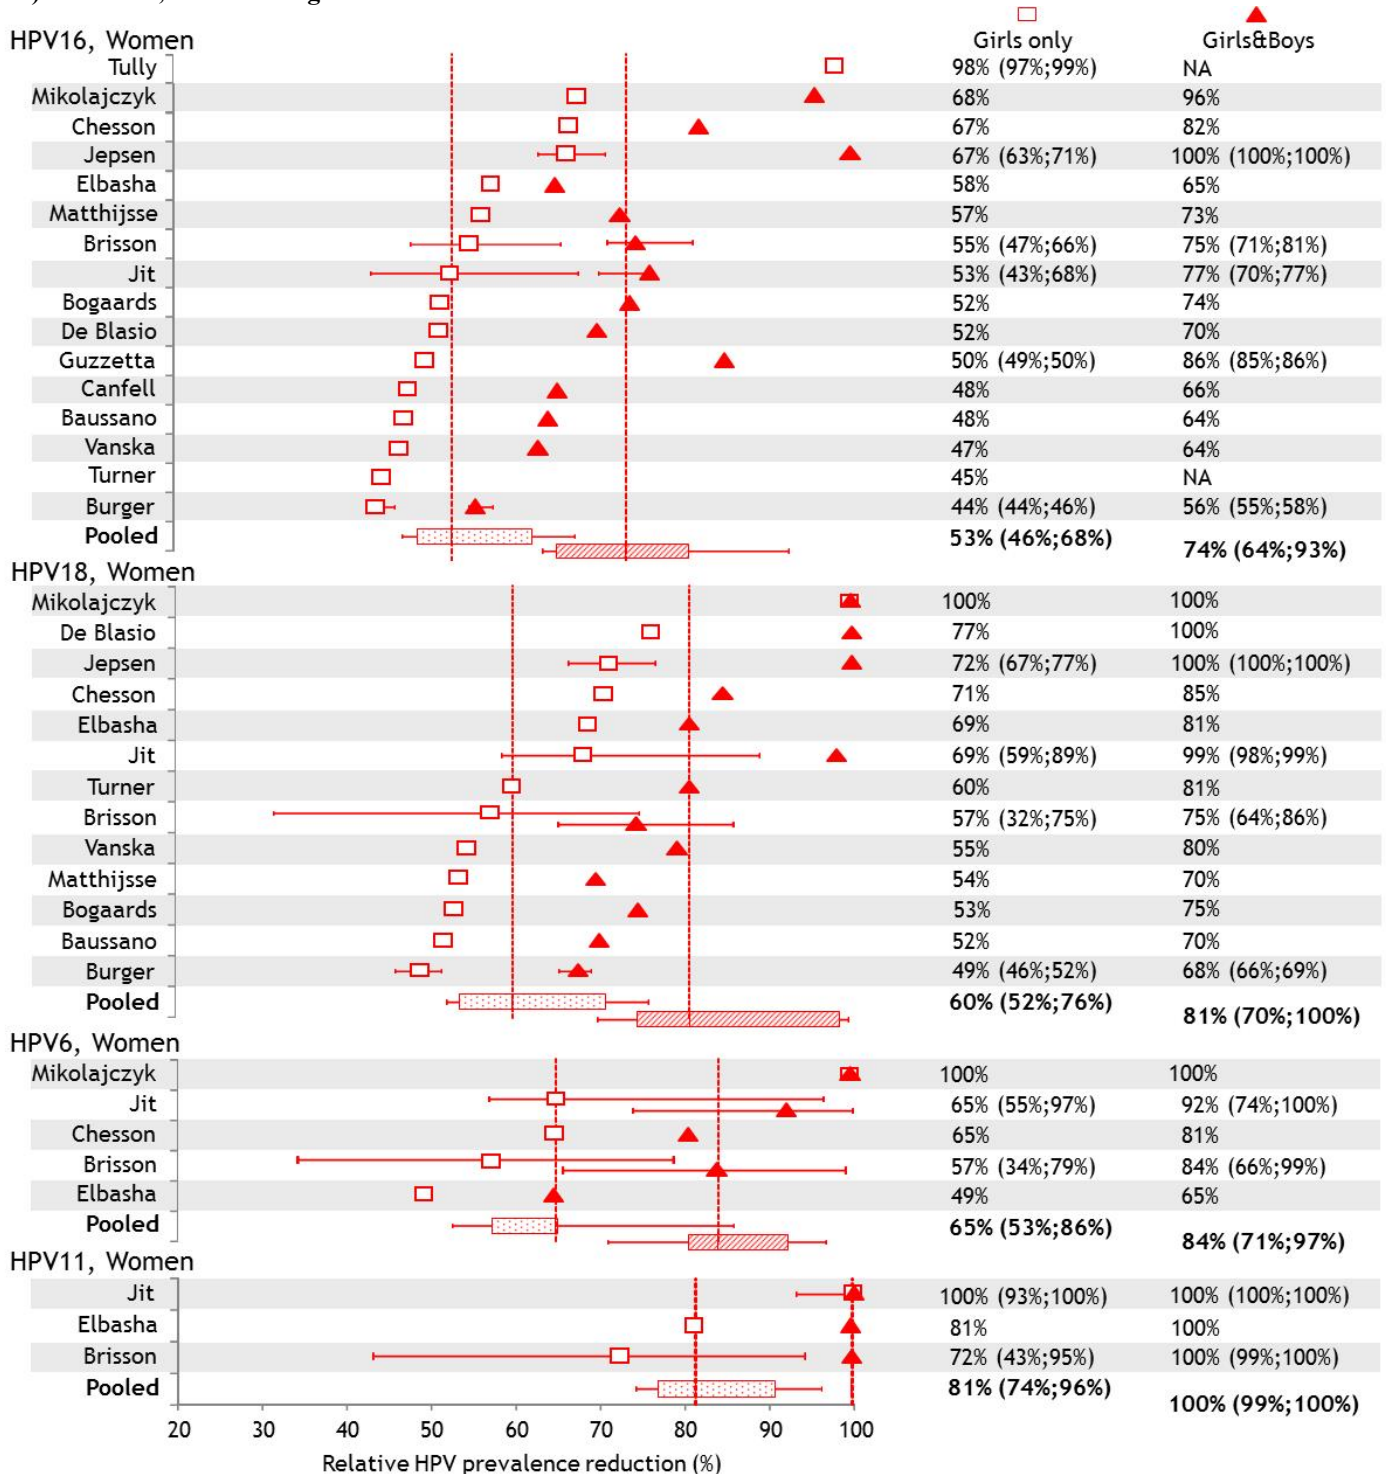

NA: Not available; Girls-Only: Vaccination of pre-adolescent girls only; Girls&Boys: Vaccination of pre-adolescent girls and boys. The models are identified by their corresponding author. For illustrative purposes, the models are ranked according to their predicted reduction of HPV16, HPV18, HPV6, or HPV11. The pooled estimates represent the median and the uncertainty interval (10%; 90% percentiles) of predictions. Predictions were performed for the base-case vaccine characteristics: Vaccine efficacy=100% and Duration of vaccine protection=Lifelong. Models with error bars provided uncertainty intervals (10%; 90% percentile) around their median model predictions. Mikolajczyk model the impact of HPV6 and HPV11 separately but use the same parameters for both types.

**B) Women, 80% coverage**

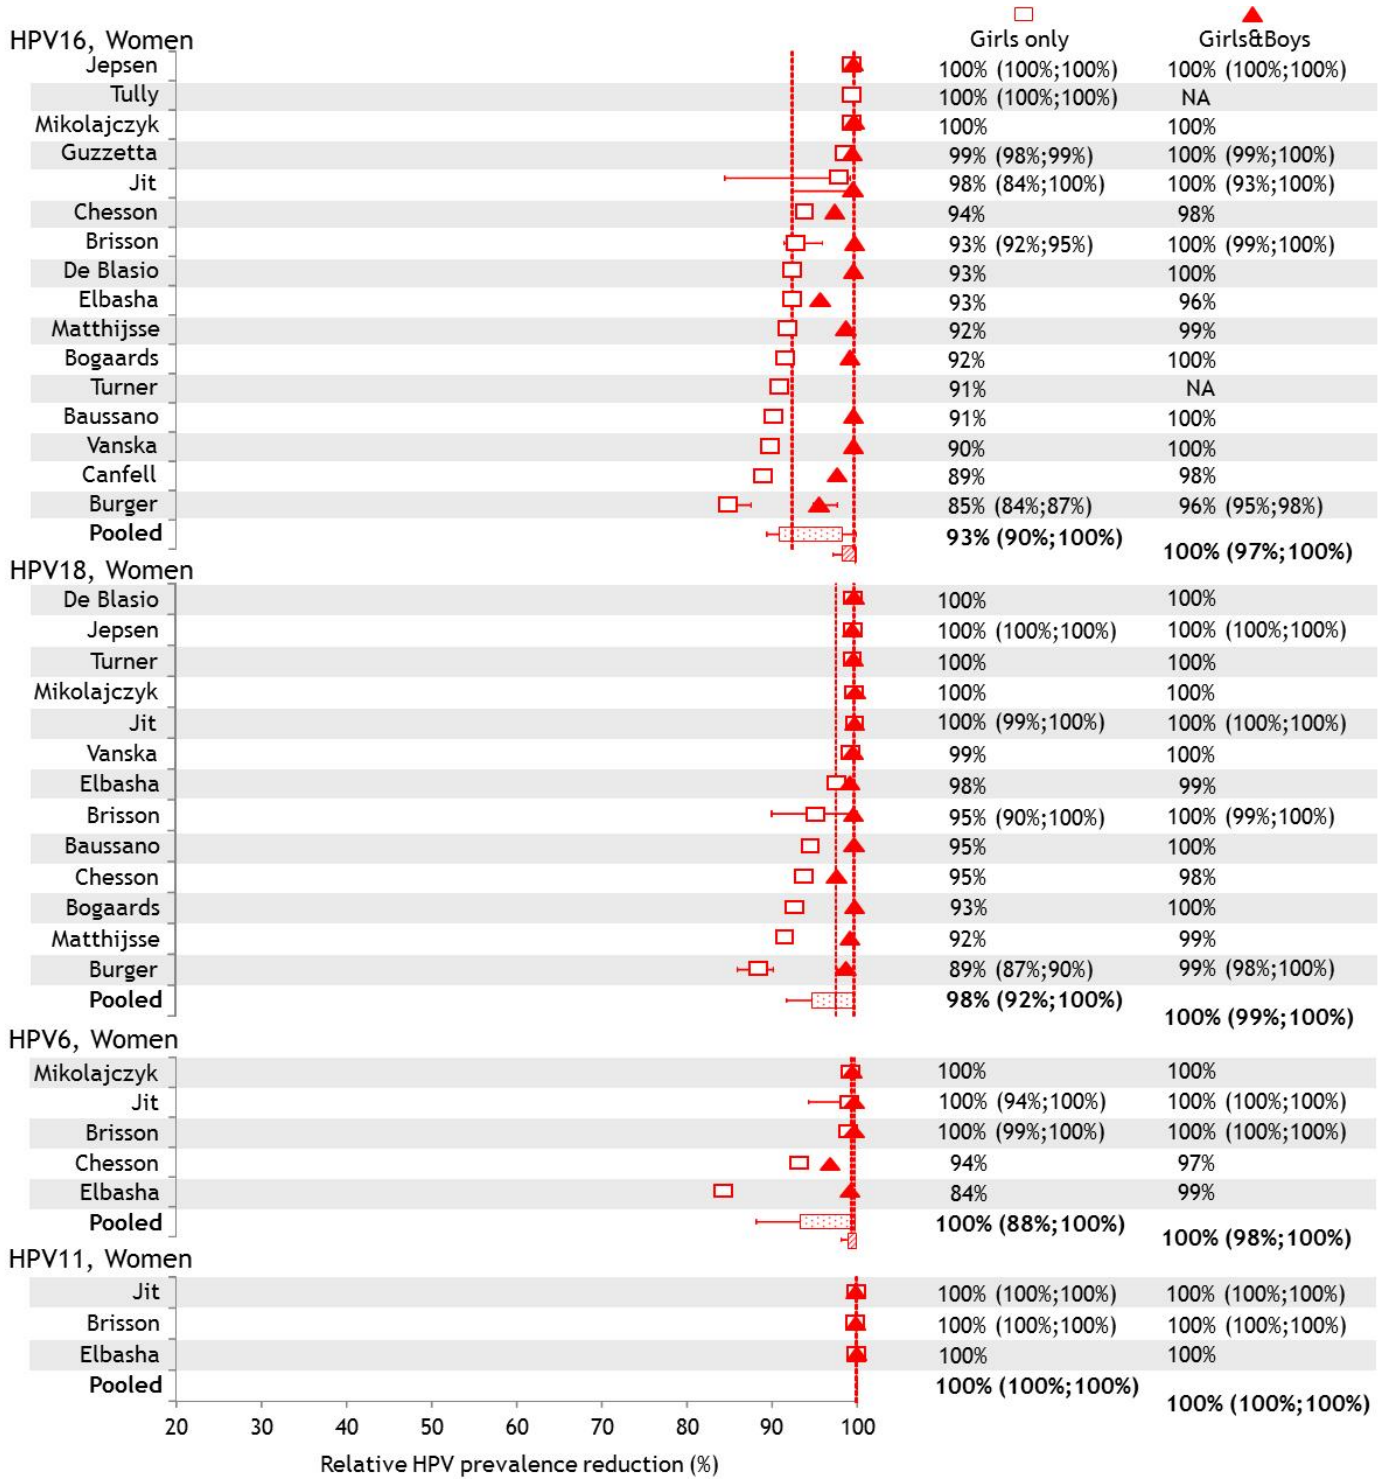

NA: Not available; Girls-Only: Vaccination of pre-adolescent girls only; Girls&Boys: Vaccination of pre-adolescent girls and boys. The models are identified by their corresponding author. For illustrative purposes, the models are ranked according to their predicted reduction of HPV16, HPV18, HPV6, or HPV11. The pooled estimates represent the median and the uncertainty interval (10%; 90% percentiles) of predictions. Predictions were performed for the base-case vaccine characteristics: Vaccine efficacy=100% and Duration of vaccine protection=Lifelong. Models with error bars provided uncertainty intervals (10%; 90% percentile) around their median model predictions. Mikolajczyk model the impact of HPV6 and HPV11 separately but use the same parameters for both types.

C) Men, 40% coverage

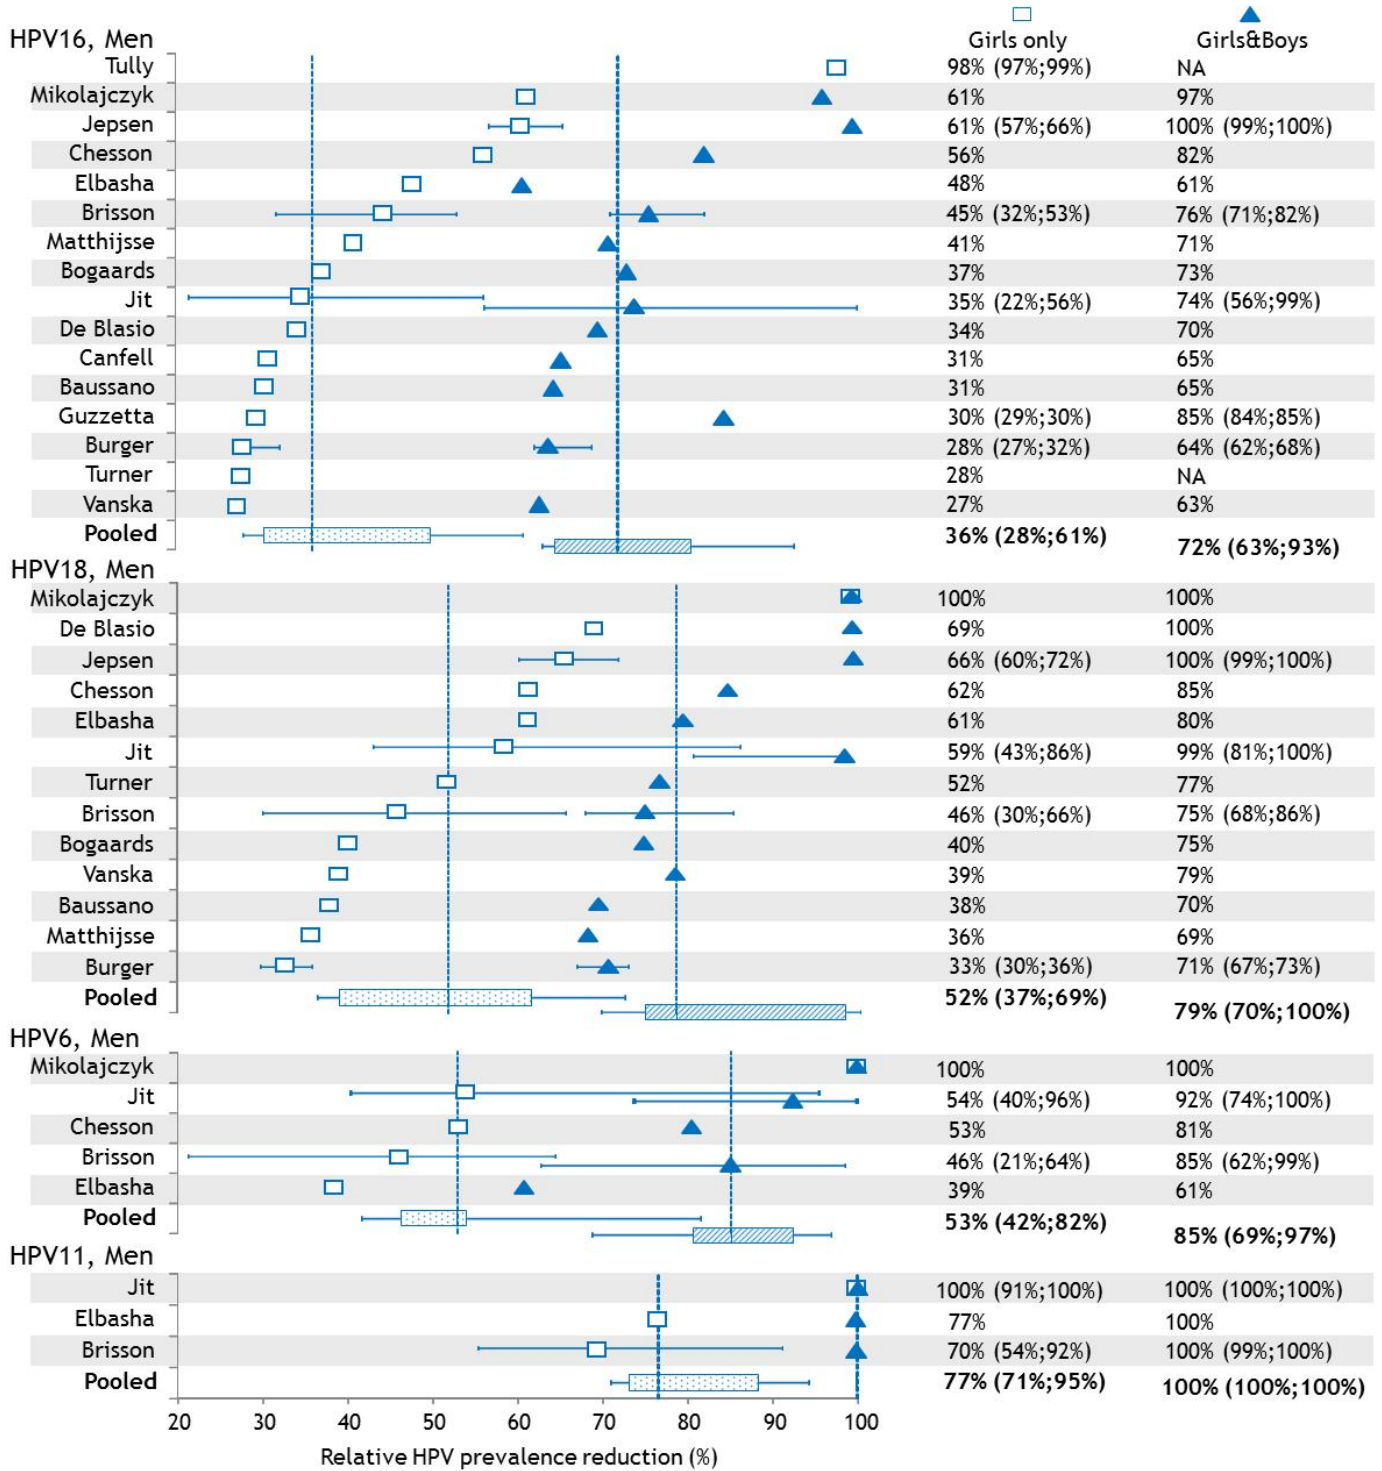

NA: Not available; Girls-Only: Vaccination of pre-adolescent girls only; Girls&Boys: Vaccination of pre-adolescent girls and boys. The models are identified by their corresponding author. For illustrative purposes, the models are ranked according to their predicted reduction of HPV16, HPV18, HPV6, or HPV11. The pooled estimates represent the median and the uncertainty interval (10%; 90% percentiles) of predictions. Predictions were performed for the base-case vaccine characteristics: Vaccine efficacy=100% and Duration of vaccine protection=Lifelong. Models with error bars provided uncertainty intervals (10%; 90% percentile) around their median model predictions. Mikolajczyk model the impact of HPV6 and HPV11 separately but use the same parameters for both types.



### D) Men, 80% coverage

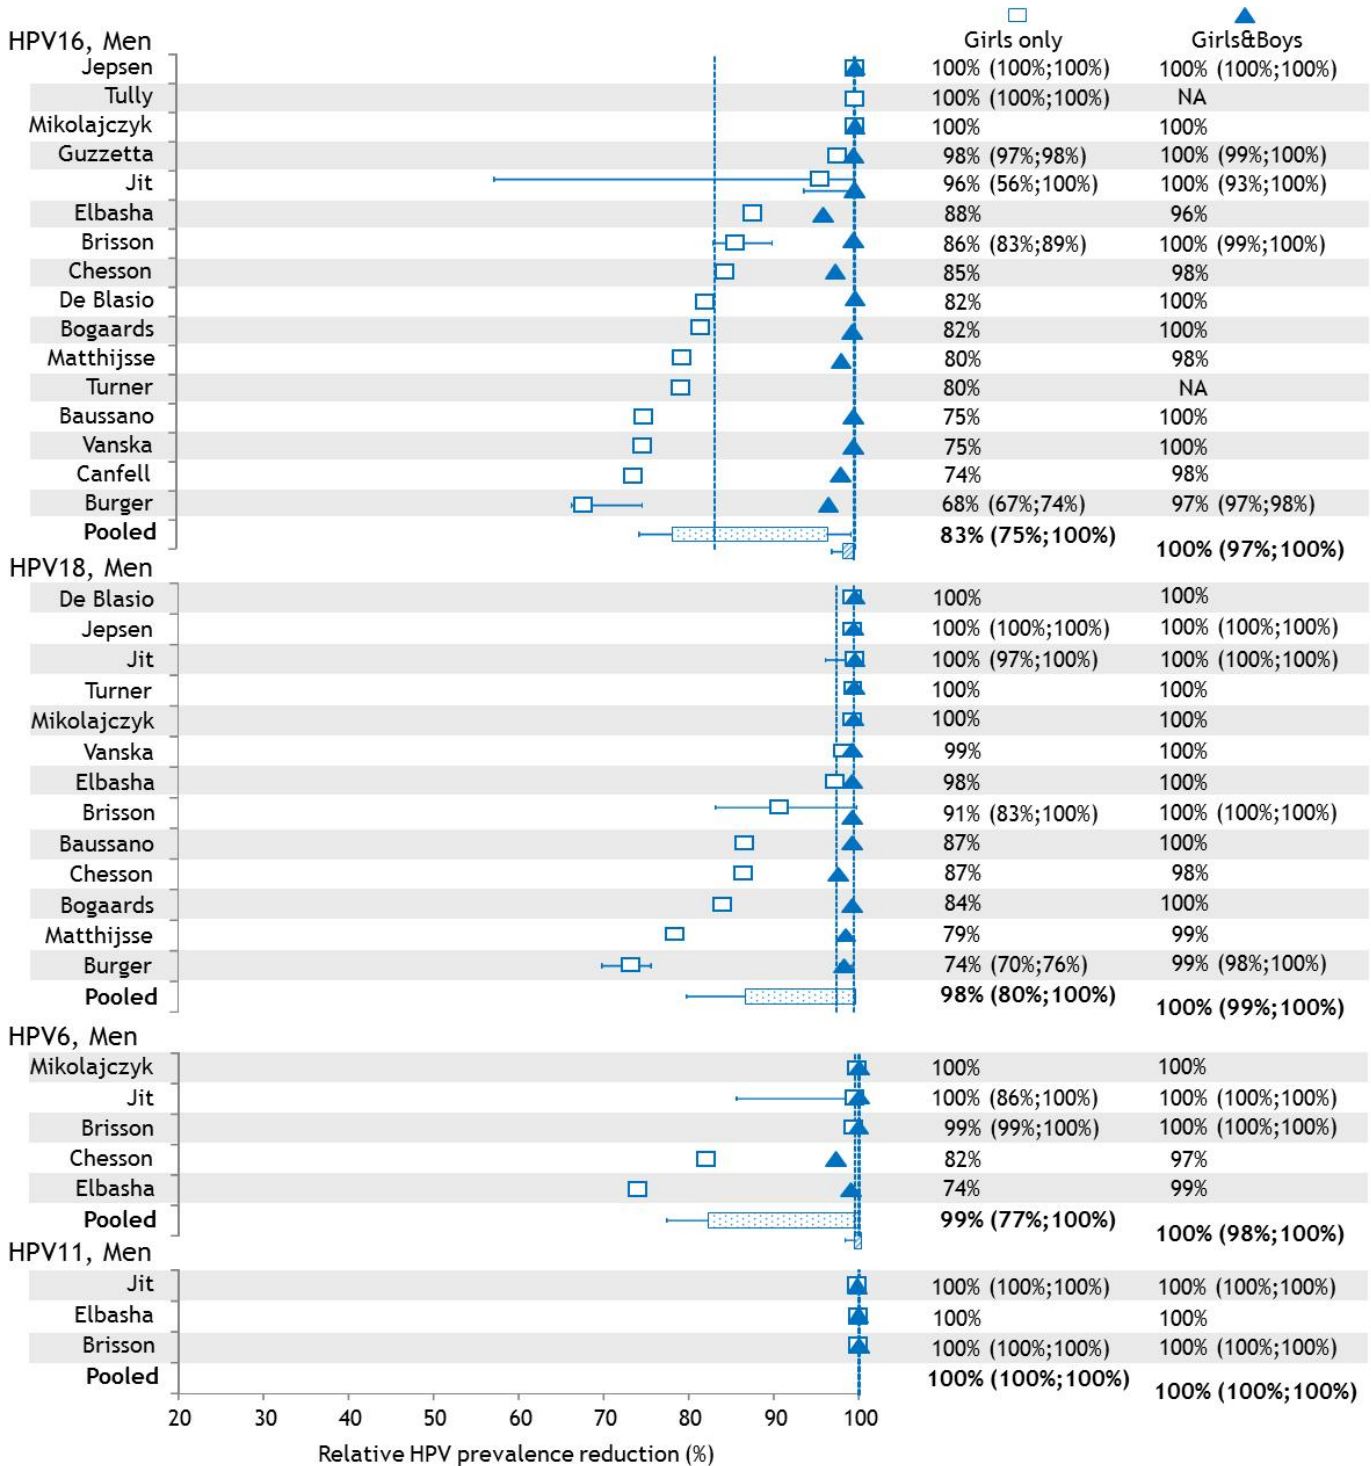

NA: Not available; Girls-Only: Vaccination of pre-adolescent girls only; Girls&Boys: Vaccination of pre-adolescent girls and boys. The models are identified by their corresponding author. For illustrative purposes, the models are ranked according to their predicted reduction of HPV16, HPV18, HPV6, or HPV11. The pooled estimates represent the median and the uncertainty interval (10%; 90% percentiles) of predictions. Predictions were performed for the base-case vaccine characteristics: Vaccine efficacy=100% and Duration of vaccine protection=Lifelong. Models with error bars provided uncertainty intervals (10%; 90% percentile) around their median model predictions. Mikolajczyk model the impact of HPV6 and HPV11 separately but use the same parameters for both types.

**Table S4. Pooled model predictions of relative reduction in HPV prevalence (RR<sub>prev</sub>) for different strategies after 70 years of vaccination**

**A) HPV16 and 18, among women**

| Coverage                                                                                                 | HPV16 RR <sub>prev</sub> (n=16)*<br>Median (80% Uncertainty Interval <sup>†</sup> ) |                     |                                            | HPV16 RR <sub>prev</sub> (n=14)<br>Median (80% Uncertainty Interval) |                     |                                            | HPV18 RR <sub>prev</sub> (n=13)<br>Median (80% Uncertainty Interval) |                     |                                            |
|----------------------------------------------------------------------------------------------------------|-------------------------------------------------------------------------------------|---------------------|--------------------------------------------|----------------------------------------------------------------------|---------------------|--------------------------------------------|----------------------------------------------------------------------|---------------------|--------------------------------------------|
|                                                                                                          | Girls-Only                                                                          | Girls&Boys          | Incremental<br>Girls&Boys vs<br>Girls-Only | Girls-Only                                                           | Girls&Boys          | Incremental<br>Girls&Boys vs<br>Girls-Only | Girls-Only                                                           | Girls&Boys          | Incremental<br>Girls&Boys vs<br>Girls-Only |
| <b>Base Case</b> ( <i>vaccine efficacy=100% ; duration of vaccine protection=Life</i> )                  |                                                                                     |                     |                                            |                                                                      |                     |                                            |                                                                      |                     |                                            |
| 20%                                                                                                      | 27%<br>(23%;39%)                                                                    | 40%<br>(34%;58%)    | 13%<br>(9%;19%)                            | 27%<br>(23%;37%)                                                     | 41%<br>(34%;58%)    | 13%<br>(8%;20%)                            | 32%<br>(27%;44%)                                                     | 45%<br>(38%;65%)    | 14%<br>(11%;25%)                           |
| 40%                                                                                                      | 53%<br>(46%;68%)                                                                    | 74%<br>(64%;93%)    | 18%<br>(13%;32%)                           | 53%<br>(45%;67%)                                                     | 73%<br>(64%;93%)    | 18%<br>(13%;27%)                           | 60%<br>(52%;76%)                                                     | 81%<br>(70%;100%)   | 19%<br>(12%;28%)                           |
| 60%                                                                                                      | 77%<br>(70%;96%)                                                                    | 92%<br>(86%;100%)   | 15%<br>(7%;19%)                            | 76%<br>(69%;90%)                                                     | 91%<br>(85%;100%)   | 14%<br>(7%;19%)                            | 86%<br>(75%;100%)                                                    | 96%<br>(91%;100%)   | 9%<br>(0%;19%)                             |
| 80%                                                                                                      | 93%<br>(90%;100%)                                                                   | 100%<br>(97%;100%)  | 7%<br>(0%;10%)                             | 92%<br>(89%;99%)                                                     | 100%<br>(96%;100%)  | 7%<br>(0%;10%)                             | 98%<br>(92%;100%)                                                    | 100%<br>(99%;100%)  | 1%<br>(0%;8%)                              |
| 100%                                                                                                     | 100%<br>(100%;100%)                                                                 | 100%<br>(100%;100%) | 0%<br>(0%;0%)                              | 100%<br>(100%;100%)                                                  | 100%<br>(100%;100%) | 0%<br>(0%;0%)                              | 100%<br>(100%;100%)                                                  | 100%<br>(100%;100%) | 0%<br>(0%;0%)                              |
| <b>Sensitivity analysis 1</b> ( <i>vaccine efficacy=100% ; duration of vaccine protection=20 years</i> ) |                                                                                     |                     |                                            |                                                                      |                     |                                            |                                                                      |                     |                                            |
| 40%                                                                                                      | 38%<br>(16%;65%)                                                                    | 45%<br>(17%;74%)    | 11%<br>(2%;24%)                            | 38%<br>(30%;51%)                                                     | 48%<br>(39%;75%)    | 11%<br>(4%;24%)                            | 42%<br>(36%;74%)                                                     | 60%<br>(46%;100%)   | 15%<br>(5%;29%)                            |
| 80%                                                                                                      | 62%<br>(27%;98%)                                                                    | 70%<br>(21%;100%)   | 5%<br>(0%;13%)                             | 62%<br>(56%;97%)                                                     | 70%<br>(61%;100%)   | 6%<br>(0%;14%)                             | 76%<br>(59%;100%)                                                    | 91%<br>(58%;100%)   | 0%<br>(0%;19%)                             |
| <b>Sensitivity analysis 2</b> ( <i>vaccine efficacy=90% ; duration of vaccine protection=Life</i> )      |                                                                                     |                     |                                            |                                                                      |                     |                                            |                                                                      |                     |                                            |
| 40%                                                                                                      | 47%<br>(33%;66%)                                                                    | 63%<br>(46%;91%)    | 19%<br>(13%;31%)                           | 47%<br>(31%;62%)                                                     | 60%<br>(44%;93%)    | 18%<br>(13%;27%)                           | 60%<br>(37%;69%)                                                     | 73%<br>(56%;100%)   | 20%<br>(13%;32%)                           |
| 80%                                                                                                      | 86%<br>(63%;100%)                                                                   | 97%<br>(84%;100%)   | 12%<br>(0%;24%)                            | 85%<br>(61%;98%)                                                     | 96%<br>(83%;100%)   | 13%<br>(1%;24%)                            | 94%<br>(71%;100%)                                                    | 100%<br>(95%;100%)  | 5%<br>(0%;25%)                             |

\* 2 models with grouped HPV16/18 were included and 14 models provided predictions for the Girls&Boys Scenario. † 10<sup>th</sup> and 90<sup>th</sup> percentile of predictions.

**B) HPV16 and 18, among men (Table S3 – continued)**

| Coverage                                                                                                 | HPV16 RR <sub>prev</sub> (n=16)*<br>Median (80% Uncertainty Interval <sup>†</sup> ) |                     |                                            | HPV16 RR <sub>prev</sub> (n=14)<br>Median (80% Uncertainty Interval) |                     |                                            | HPV18 RR <sub>prev</sub> (n=13)<br>Median (80% Uncertainty Interval) |                     |                                            |
|----------------------------------------------------------------------------------------------------------|-------------------------------------------------------------------------------------|---------------------|--------------------------------------------|----------------------------------------------------------------------|---------------------|--------------------------------------------|----------------------------------------------------------------------|---------------------|--------------------------------------------|
|                                                                                                          | Girls-Only                                                                          | Girls&Boys          | Incremental<br>Girls&Boys vs<br>Girls-Only | Girls-Only                                                           | Girls&Boys          | Incremental<br>Girls&Boys vs<br>Girls-Only | Girls-Only                                                           | Girls&Boys          | Incremental<br>Girls&Boys vs<br>Girls-Only |
| <b>Base Case</b> ( <i>vaccine efficacy=100% ; duration of vaccine protection=Life</i> )                  |                                                                                     |                     |                                            |                                                                      |                     |                                            |                                                                      |                     |                                            |
| 20%                                                                                                      | 17%<br>(13%;33%)                                                                    | 40%<br>(34%;58%)    | 23%<br>(21%;26%)                           | 17%<br>(13%;31%)                                                     | 40%<br>(34%;58%)    | 23%<br>(21%;26%)                           | 25%<br>(17%;37%)                                                     | 46%<br>(40%;65%)    | 24%<br>(13%;32%)                           |
| 40%                                                                                                      | 36%<br>(28%;61%)                                                                    | 72%<br>(63%;93%)    | 35%<br>(27%;39%)                           | 36%<br>(28%;59%)                                                     | 71%<br>(63%;94%)    | 35%<br>(27%;39%)                           | 52%<br>(37%;69%)                                                     | 79%<br>(70%;100%)   | 32%<br>(19%;39%)                           |
| 60%                                                                                                      | 60%<br>(49%;94%)                                                                    | 92%<br>(85%;100%)   | 31%<br>(11%;40%)                           | 59%<br>(48%;85%)                                                     | 91%<br>(84%;100%)   | 32%<br>(11%;40%)                           | 77%<br>(56%;100%)                                                    | 96%<br>(90%;100%)   | 17%<br>(0%;36%)                            |
| 80%                                                                                                      | 83%<br>(75%;100%)                                                                   | 100%<br>(97%;100%)  | 16%<br>(1%;25%)                            | 82%<br>(74%;99%)                                                     | 100%<br>(97%;100%)  | 18%<br>(1%;25%)                            | 98%<br>(80%;100%)                                                    | 100%<br>(99%;100%)  | 2%<br>(0%;19%)                             |
| 100%                                                                                                     | 100%<br>(98%;100%)                                                                  | 100%<br>(100%;100%) | 0%<br>(0%;2%)                              | 100%<br>(98%;100%)                                                   | 100%<br>(100%;100%) | 0%<br>(0%;2%)                              | 100%<br>(100%;100%)                                                  | 100%<br>(100%;100%) | 0%<br>(0%;0%)                              |
| <b>Sensitivity analysis 1</b> ( <i>vaccine efficacy=100% ; duration of vaccine protection=20 years</i> ) |                                                                                     |                     |                                            |                                                                      |                     |                                            |                                                                      |                     |                                            |
| 40%                                                                                                      | 25%<br>(6%;57%)                                                                     | 47%<br>(12%;72%)    | 23%<br>(6%;35%)                            | 25%<br>(13%;40%)                                                     | 51%<br>(23%;72%)    | 23%<br>(6%;35%)                            | 30%<br>(25%;66%)                                                     | 57%<br>(43%;100%)   | 26%<br>(8%;35%)                            |
| 80%                                                                                                      | 49%<br>(12%;98%)                                                                    | 70%<br>(17%;100%)   | 14%<br>(4%;25%)                            | 49%<br>(29%;94%)                                                     | 73%<br>(44%;100%)   | 14%<br>(6%;25%)                            | 59%<br>(48%;100%)                                                    | 91%<br>(53%;100%)   | 8%<br>(0%;28%)                             |
| <b>Sensitivity analysis 2</b> ( <i>vaccine efficacy=90% ; duration of vaccine protection=Life</i> )      |                                                                                     |                     |                                            |                                                                      |                     |                                            |                                                                      |                     |                                            |
| 40%                                                                                                      | 27%<br>(20%;58%)                                                                    | 62%<br>(51%;91%)    | 34%<br>(26%;45%)                           | 27%<br>(18%;54%)                                                     | 60%<br>(51%;93%)    | 33%<br>(25%;42%)                           | 50%<br>(25%;61%)                                                     | 71%<br>(56%;100%)   | 31%<br>(18%;41%)                           |
| 80%                                                                                                      | 71%<br>(43%;100%)                                                                   | 97%<br>(86%;100%)   | 30%<br>(1%;46%)                            | 64%<br>(41%;97%)                                                     | 96%<br>(86%;100%)   | 31%<br>(3%;46%)                            | 88%<br>(53%;100%)                                                    | 99%<br>(94%;100%)   | 12%<br>(0%;40%)                            |

\* 2 models with grouped HPV16/18 were included and 14 models provided predictions for the Girls&Boys Scenario. <sup>†</sup> 10<sup>th</sup> and 90<sup>th</sup> percentile of predictions.

C) HPV6 and 11, among women (Table S3 – continued)

| Coverage                                                                                                 | HPV6 RR <sub>prev</sub> (n=5) *                 |                     |                                            | HPV6 RR <sub>prev</sub> (n=3)     |                     |                                            | HPV11 RR <sub>prev</sub> (n=3)    |                     |                                            |
|----------------------------------------------------------------------------------------------------------|-------------------------------------------------|---------------------|--------------------------------------------|-----------------------------------|---------------------|--------------------------------------------|-----------------------------------|---------------------|--------------------------------------------|
|                                                                                                          | Median (80% Uncertainty Interval <sup>†</sup> ) |                     | Incremental<br>Girls&Boys vs<br>Girls-Only | Median (80% Uncertainty Interval) |                     | Incremental<br>Girls&Boys vs<br>Girls-Only | Median (80% Uncertainty Interval) |                     | Incremental<br>Girls&Boys vs<br>Girls-Only |
|                                                                                                          | Girls-Only                                      | Girls&Boys          |                                            | Girls-Only                        | Girls&Boys          |                                            | Girls-Only                        | Girls&Boys          |                                            |
| <b>Base Case</b> ( <i>vaccine efficacy=100% ; duration of vaccine protection=Life</i> )                  |                                                 |                     |                                            |                                   |                     |                                            |                                   |                     |                                            |
| 20%                                                                                                      | 35%<br>(29%;71%)                                | 54%<br>(39%;82%)    | 11%<br>(8%;18%)                            | 32%<br>(27%;34%)                  | 43%<br>(37%;52%)    | 11%<br>(10%;18%)                           | 43%<br>(35%;82%)                  | 65%<br>(57%;93%)    | 22%<br>(11%;22%)                           |
| 40%                                                                                                      | 65%<br>(53%;86%)                                | 84%<br>(71%;97%)    | 16%<br>(6%;27%)                            | 57%<br>(51%;63%)                  | 84%<br>(69%;91%)    | 27%<br>(18%;27%)                           | 81%<br>(74%;96%)                  | 100%<br>(99%;100%)  | 19%<br>(4%;26%)                            |
| 60%                                                                                                      | 83%<br>(75%;96%)                                | 100%<br>(89%;100%)  | 10%<br>(4%;17%)                            | 83%<br>(72%;88%)                  | 100%<br>(89%;100%)  | 17%<br>(12%;17%)                           | 100%<br>(99%;100%)                | 100%<br>(99%;100%)  | 0%<br>(0%;1%)                              |
| 80%                                                                                                      | 100%<br>(88%;100%)                              | 100%<br>(98%;100%)  | 0%<br>(0%;10%)                             | 100%<br>(88%;100%)                | 100%<br>(99%;100%)  | 0%<br>(0%;12%)                             | 100%<br>(100%;100%)               | 100%<br>(100%;100%) | 0%<br>(0%;0%)                              |
| 100%                                                                                                     | 100%<br>(99%;100%)                              | 100%<br>(100%;100%) | 0%<br>(0%;1%)                              | 100%<br>(98%;100%)                | 100%<br>(100%;100%) | 0%<br>(0%;2%)                              | 100%<br>(100%;100%)               | 100%<br>(100%;100%) | 0%<br>(0%;0%)                              |
| <b>Sensitivity analysis 1</b> ( <i>vaccine efficacy=100% ; duration of vaccine protection=20 years</i> ) |                                                 |                     |                                            |                                   |                     |                                            |                                   |                     |                                            |
| 40%                                                                                                      | 48%<br>(28%;86%)                                | 69%<br>(38%;97%)    | 10%<br>(4%;25%)                            | 37%<br>(27%;55%)                  | 49%<br>(36%;81%)    | 11%<br>(10%;27%)                           | 46%<br>(40%;89%)                  | 80%<br>(62%;96%)    | 18%<br>(4%;31%)                            |
| 80%                                                                                                      | 89%<br>(55%;100%)                               | 99%<br>(71%;100%)   | 7%<br>(0%;19%)                             | 78%<br>(52%;96%)                  | 98%<br>(68%;100%)   | 15%<br>(3%;20%)                            | 95%<br>(76%;99%)                  | 100%<br>(99%;100%)  | 5%<br>(1%;23%)                             |
| <b>Sensitivity analysis 2</b> ( <i>vaccine efficacy=90% ; duration of vaccine protection=Life</i> )      |                                                 |                     |                                            |                                   |                     |                                            |                                   |                     |                                            |
| 40%                                                                                                      | 59%<br>(36%;84%)                                | 77%<br>(52%;94%)    | 17%<br>(6%;23%)                            | 42%<br>(34%;56%)                  | 56%<br>(51%;80%)    | 18%<br>(15%;25%)                           | 72%<br>(52%;94%)                  | 99%<br>(91%;100%)   | 27%<br>(5%;39%)                            |
| 80%                                                                                                      | 90%<br>(68%;100%)                               | 100%<br>(94%;100%)  | 6%<br>(0%;30%)                             | 75%<br>(65%;94%)                  | 100%<br>(95%;100%)  | 19%<br>(4%;33%)                            | 100%<br>(98%;100%)                | 100%<br>(100%;100%) | 0%<br>(0%;2%)                              |

<sup>†</sup> 2 models with grouped HPV6/11 were included in these analyses. <sup>‡</sup> 10<sup>th</sup> and 90<sup>th</sup> percentile of predictions.

**D) HPV6 and 11, among men (Table S3 – continued)**

| Coverage                                                                                                 | HPV6 RR <sub>prev</sub> (n=5)*                  |                     |                                            | HPV6 RR <sub>prev</sub> (n=3)     |                     |                                            | HPV11 RR <sub>prev</sub> (n=3)    |                     |                                            |
|----------------------------------------------------------------------------------------------------------|-------------------------------------------------|---------------------|--------------------------------------------|-----------------------------------|---------------------|--------------------------------------------|-----------------------------------|---------------------|--------------------------------------------|
|                                                                                                          | Median (80% Uncertainty Interval <sup>†</sup> ) |                     | Incremental<br>Girls&Boys vs<br>Girls-Only | Median (80% Uncertainty Interval) |                     | Incremental<br>Girls&Boys vs<br>Girls-Only | Median (80% Uncertainty Interval) |                     | Incremental<br>Girls&Boys vs<br>Girls-Only |
|                                                                                                          | Girls-Only                                      | Girls&Boys          |                                            | Girls-Only                        | Girls&Boys          |                                            | Girls-Only                        | Girls&Boys          |                                            |
| <b>Base Case</b> ( <i>vaccine efficacy=100% ; duration of vaccine protection=Life</i> )                  |                                                 |                     |                                            |                                   |                     |                                            |                                   |                     |                                            |
| 20%                                                                                                      | 26%<br>(21%;67%)                                | 54%<br>(37%;82%)    | 24%<br>(7%;27%)                            | 23%<br>(20%;25%)                  | 44%<br>(35%;52%)    | 24%<br>(10%;27%)                           | 37%<br>(30%;80%)                  | 64%<br>(60%;93%)    | 27%<br>(12%;30%)                           |
| 40%                                                                                                      | 53%<br>(42%;82%)                                | 85%<br>(69%;97%)    | 28%<br>(3%;43%)                            | 46%<br>(40%;52%)                  | 85%<br>(66%;91%)    | 38%<br>(13%;45%)                           | 77%<br>(71%;95%)                  | 100%<br>(100%;100%) | 23%<br>(5%;29%)                            |
| 60%                                                                                                      | 76%<br>(62%;93%)                                | 100%<br>(87%;100%)  | 17%<br>(0%;35%)                            | 70%<br>(59%;81%)                  | 100%<br>(87%;100%)  | 17%<br>(3%;38%)                            | 100%<br>(99%;100%)                | 100%<br>(99%;100%)  | 0%<br>(0%;1%)                              |
| 80%                                                                                                      | 99%<br>(77%;100%)                               | 100%<br>(98%;100%)  | 0%<br>(0%;22%)                             | 87%<br>(77%;97%)                  | 100%<br>(99%;100%)  | 0%<br>(0%;21%)                             | 100%<br>(100%;100%)               | 100%<br>(100%;100%) | 0%<br>(0%;0%)                              |
| 100%                                                                                                     | 100%<br>(92%;100%)                              | 100%<br>(100%;100%) | 0%<br>(0%;8%)                              | 100%<br>(96%;100%)                | 100%<br>(100%;100%) | 0%<br>(0%;4%)                              | 100%<br>(100%;100%)               | 100%<br>(100%;100%) | 0%<br>(0%;0%)                              |
| <b>Sensitivity analysis 1</b> ( <i>vaccine efficacy=100% ; duration of vaccine protection=20 years</i> ) |                                                 |                     |                                            |                                   |                     |                                            |                                   |                     |                                            |
| 40%                                                                                                      | 40%<br>(22%;84%)                                | 72%<br>(38%;97%)    | 18%<br>(5%;35%)                            | 35%<br>(22%;48%)                  | 53%<br>(36%;83%)    | 24%<br>(15%;36%)                           | 44%<br>(36%;89%)                  | 84%<br>(61%;97%)    | 22%<br>(4%;36%)                            |
| 80%                                                                                                      | 88%<br>(49%;100%)                               | 99%<br>(70%;100%)   | 10%<br>(0%;22%)                            | 68%<br>(43%;94%)                  | 99%<br>(66%;100%)   | 20%<br>(4%;23%)                            | 95%<br>(71%;99%)                  | 100%<br>(99%;100%)  | 5%<br>(1%;28%)                             |
| <b>Sensitivity analysis 2</b> ( <i>vaccine efficacy=90% ; duration of vaccine protection=Life</i> )      |                                                 |                     |                                            |                                   |                     |                                            |                                   |                     |                                            |
| 40%                                                                                                      | 48%<br>(27%;80%)                                | 77%<br>(52%;94%)    | 28%<br>(8%;34%)                            | 32%<br>(26%;45%)                  | 52%<br>(52%;79%)    | 28%<br>(22%;36%)                           | 65%<br>(48%;93%)                  | 99%<br>(93%;100%)   | 33%<br>(7%;45%)                            |
| 80%                                                                                                      | 78%<br>(57%;100%)                               | 100%<br>(93%;100%)  | 18%<br>(0%;40%)                            | 61%<br>(56%;92%)                  | 100%<br>(93%;100%)  | 31%<br>(6%;42%)                            | 100%<br>(98%;100%)                | 100%<br>(100%;100%) | 0%<br>(0%;2%)                              |

<sup>†</sup> 2 models with grouped HPV6/11 were included in these analyses. <sup>†</sup> 10<sup>th</sup> and 90<sup>th</sup> percentile of predictions.

**Table S5: Percentage and number of models predicting similar or greater vaccination impact for HPV18, HPV6 and HPV11 than HPV16\***

|              | Women           |                 |                 |                 | Men             |                 |                 |                 |
|--------------|-----------------|-----------------|-----------------|-----------------|-----------------|-----------------|-----------------|-----------------|
|              | Girls only      |                 | Girls&Boys      |                 | Girls only      |                 | Girls&Boys      |                 |
|              | % (n)           |                 | % (n)           |                 | % (n)           |                 | % (n)           |                 |
|              | 40%<br>Coverage | 80%<br>Coverage | 40%<br>Coverage | 80%<br>Coverage | 40%<br>Coverage | 80%<br>Coverage | 40%<br>Coverage | 80%<br>Coverage |
| <b>HPV18</b> | 92%<br>(12/13)  | 100%<br>(13/13) | 92%<br>(11/12)  | 100%<br>(12/12) | 92%<br>(12/13)  | 92%<br>(12/13)  | 83%<br>(10/12)  | 100%<br>(12/12) |
| <b>HPV6</b>  | 67%<br>(2/3)    | 67%<br>(2/3)    | 100%<br>(3/3)   | 100%<br>(3/3)   | 67%<br>(2/3)    | 67%<br>(2/3)    | 100%<br>(3/3)   | 100%<br>(3/3)   |
| <b>HPV11</b> | 100%<br>(3/3)   |

\* We did not include models that merged types HPV16 and HPV18 or HPV6 and HPV 11.

**Table S6. Percentage and number of models predicting HPV elimination<sup>†</sup>**

| Coverage | HPV16                |                       | HPV18                |                      | HPV6                |                     | HPV11               |                     |
|----------|----------------------|-----------------------|----------------------|----------------------|---------------------|---------------------|---------------------|---------------------|
|          | % (n)                |                       | % (n)                |                      | % (n)               |                     | % (n)               |                     |
|          | Girls-Only<br>(N=16) | Girls&Boys<br>(N=14)* | Girls-Only<br>(N=13) | Girls&Boys<br>(N=13) | Girls-Only<br>(N=5) | Girls&Boys<br>(N=5) | Girls-Only<br>(N=3) | Girls&Boys<br>(N=3) |
| 20%      | 0% (0)               | 0% (0)                | 0% (0)               | 8% (1)               | 0% (0)              | 20% (1)             | 0% (0)              | 33% (1)             |
| 40%      | 0% (0)               | 7% (1)                | 8% (1)               | 31% (4)              | 20% (1)             | 20% (1)             | 33% (1)             | 100% (3)            |
| 60%      | 13% (2)              | 29% (4)               | 23% (3)              | 38% (5)              | 20% (1)             | 60% (3)             | 100% (3)            | 100% (3)            |
| 80%      | 19% (3)              | 64% (9)               | 46% (6)              | 92% (12)             | 60% (3)             | 80% (4)             | 100% (3)            | 100% (3)            |
| 100%     | 88% (14)             | 100% (14)             | 92% (12)             | 100% (13)            | 60% (3)             | 100% (5)            | 100% (3)            | 100% (3)            |

<sup>†</sup> Elimination: RR<sub>prev</sub> ≥ 99% for both women and men after 70 years of vaccination

\* 14 models provided predictions for the Girls&Boys Scenario.

Figure S2. Post-vaccination dynamics: pooled predictions of the relative reduction in HPV16, 18, 6, and 11 infections among women and men after the introduction of Girls-Only or Girls&Boys vaccination.

A) Women, 40% coverage

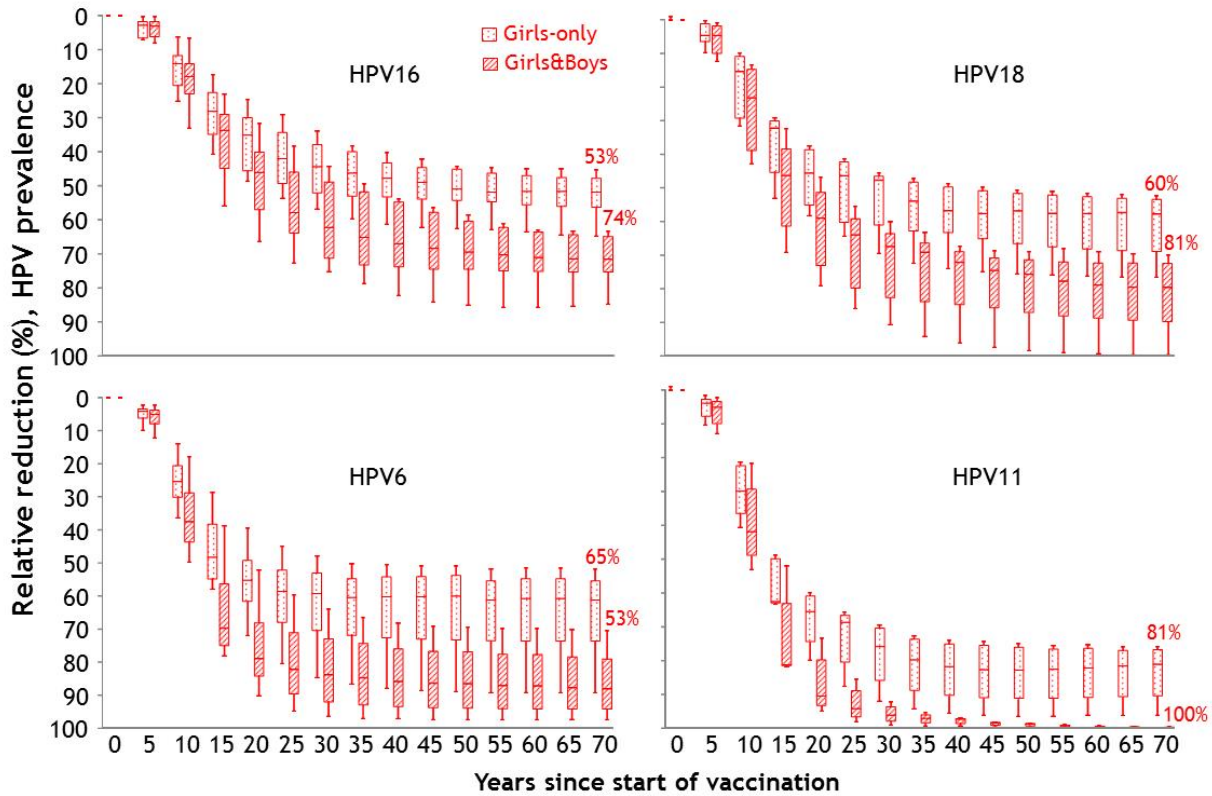

B) Women, 80% coverage

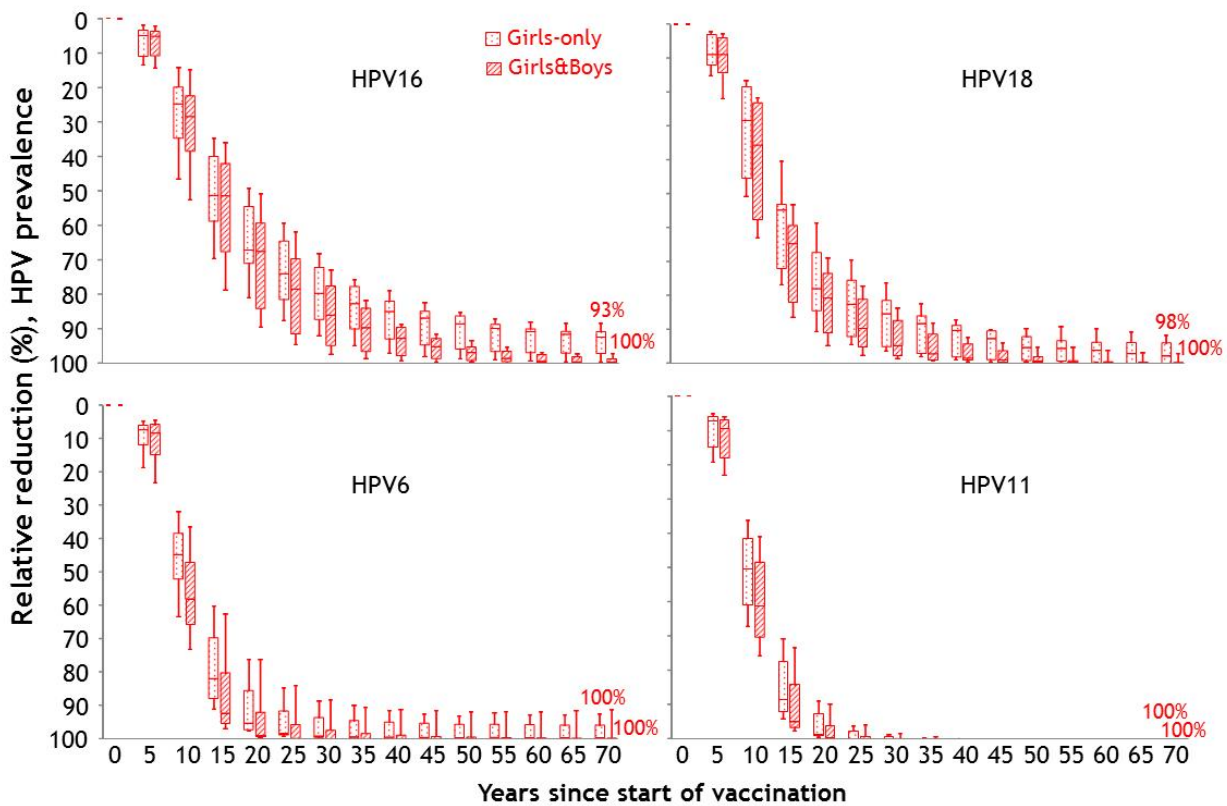

**C) Men, 40% coverage**

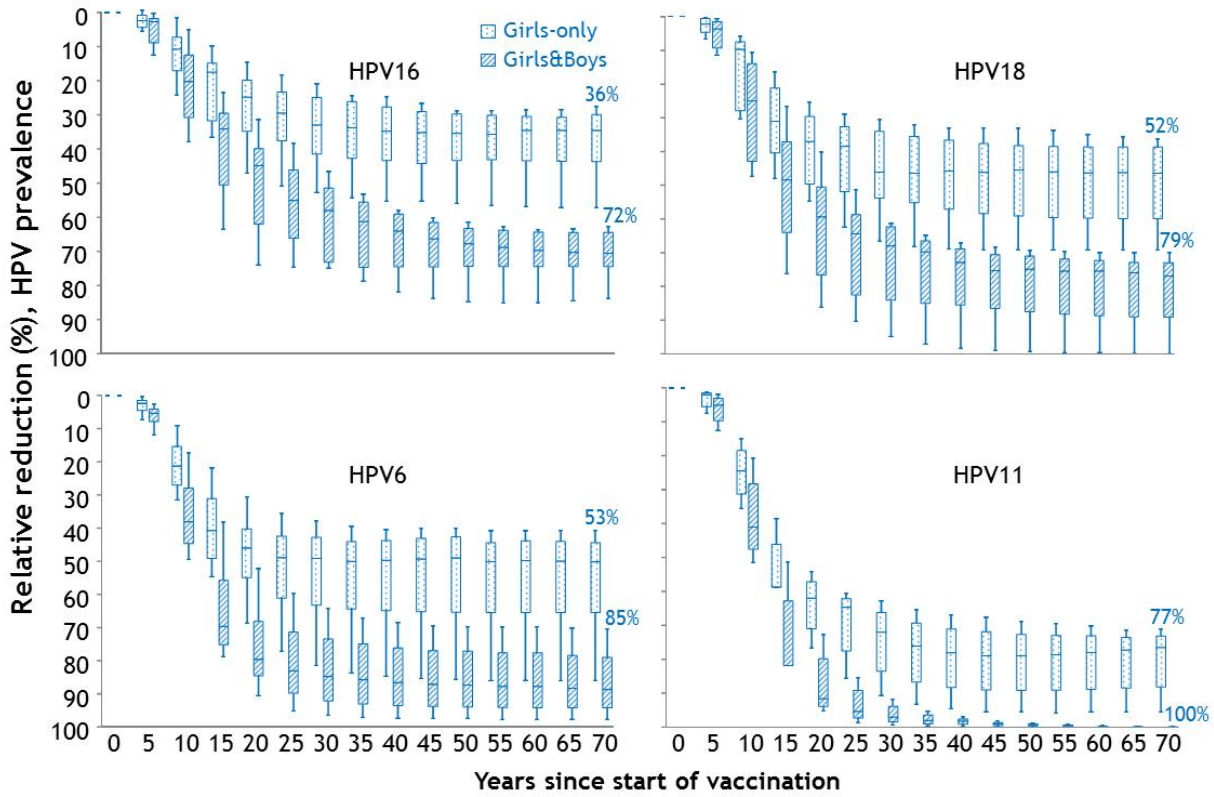

**D) Men, 80% coverage**

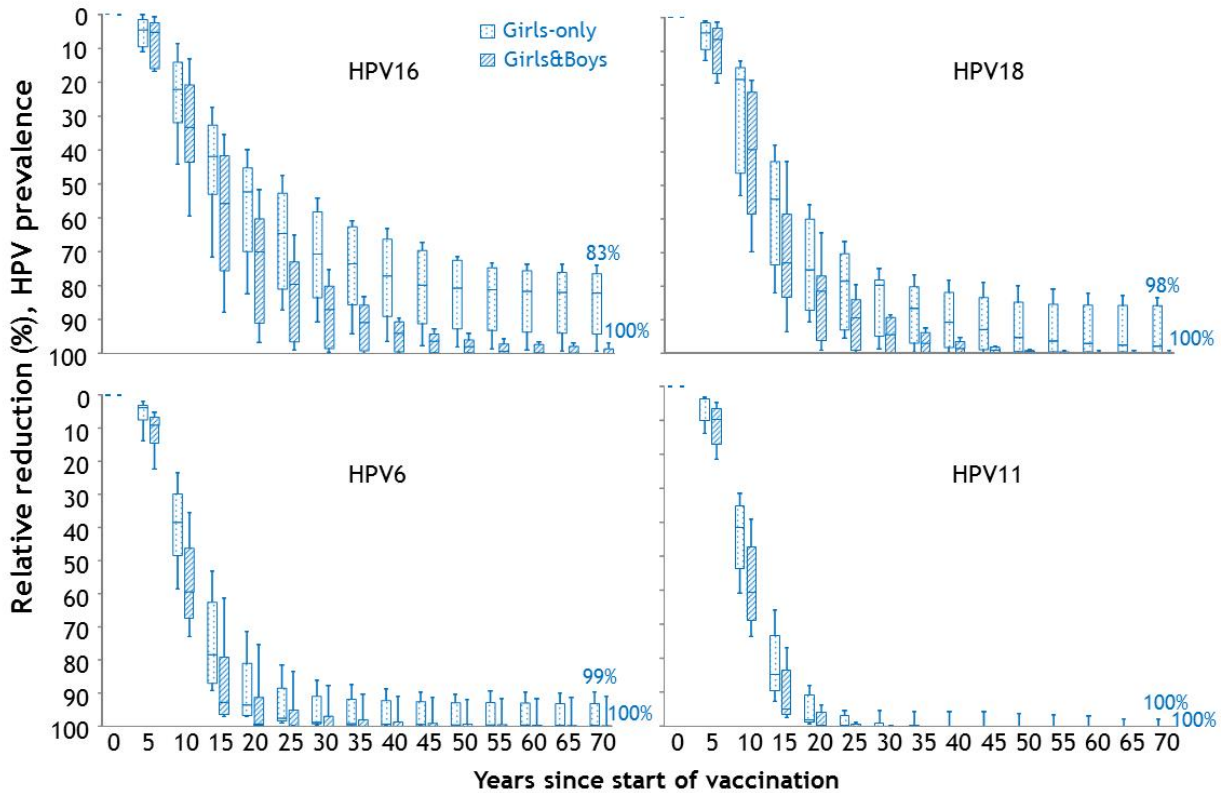

Girls-Only: Vaccination of pre-adolescent girls only; Girls&Boys: Vaccination of pre-adolescent girls and boys. The pooled estimates represent the median and the uncertainty interval (10%; 90% percentiles) of predictions. Predictions were performed for the base-case vaccine characteristics: Vaccine efficacy=100% and Duration of vaccine protection=Lifelong.



Figure S3. Sensitivity Analysis – Vaccine efficacy and duration on vaccine protection.

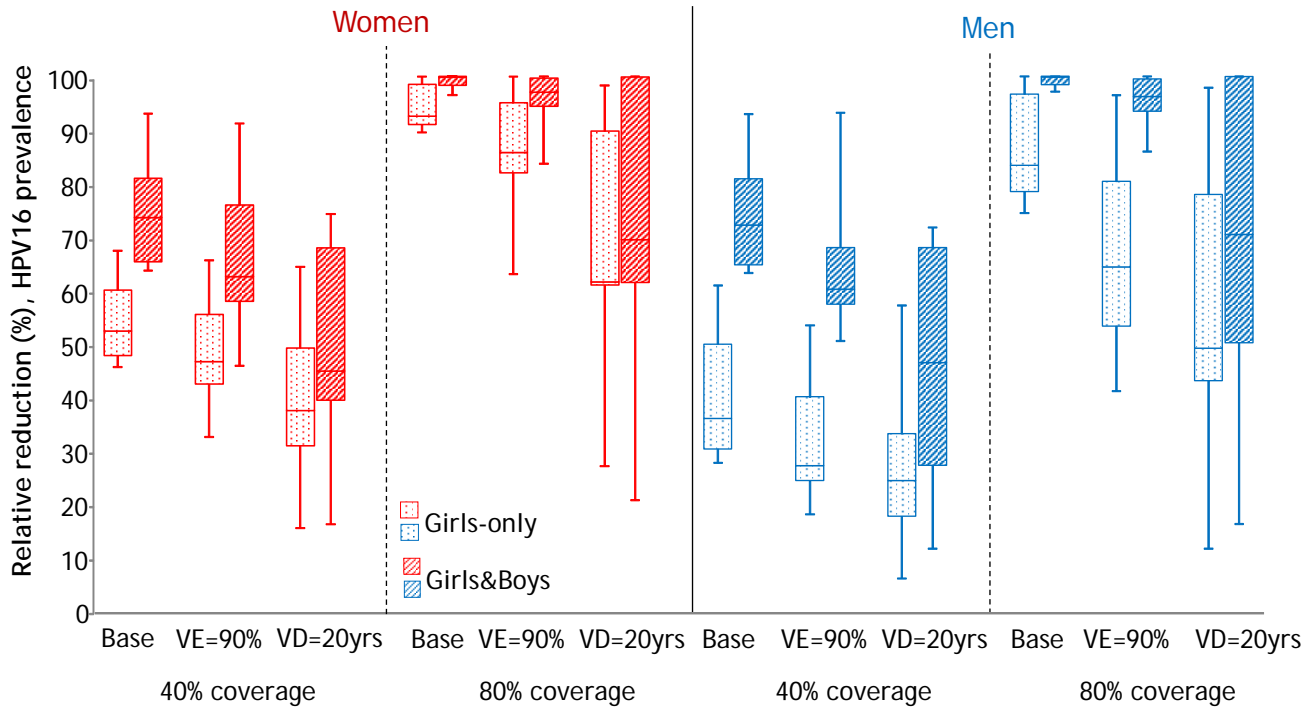

Girls-Only: Vaccination of girls only; Girls&Boys: Vaccination of girls and boys. The pooled estimates represent median and 10<sup>th</sup>, 25<sup>th</sup>, 75<sup>th</sup>, and 90<sup>th</sup> percentiles of the predictions of the models at 70 years after the introduction of vaccination. Base-case vaccine characteristics: Vaccine efficacy (VE)=100% and Duration of vaccine protection (VD)=Lifelong. See appendix table S4 for values of pooled estimates and uncertainty intervals.

**Table S7. Potential sources of heterogeneity between the different models' predictions of relative reduction in HPV16 prevalence: univariate meta-regressions.**

**A) Girls-Only vaccination**

|                                                                                       | Base                                       |                  |                                            |                 | 20 years                                   |                  |                                            |                 |
|---------------------------------------------------------------------------------------|--------------------------------------------|------------------|--------------------------------------------|-----------------|--------------------------------------------|------------------|--------------------------------------------|-----------------|
|                                                                                       | 40%                                        |                  | 80%                                        |                 | 40%                                        |                  | 80%                                        |                 |
|                                                                                       | Mean HPV16 RR <sub>prev</sub> , % (95% CI) |                  | Mean HPV16 RR <sub>prev</sub> , % (95% CI) |                 | Mean HPV16 RR <sub>prev</sub> , % (95% CI) |                  | Mean HPV16 RR <sub>prev</sub> , % (95% CI) |                 |
|                                                                                       | <i>p</i> -value                            |                  | <i>p</i> -value                            |                 | <i>p</i> -value                            |                  | <i>p</i> -value                            |                 |
|                                                                                       | Women                                      | Men              | Women                                      | Men             | Women                                      | Men              | Women                                      | Men             |
| <b>Model characteristics</b>                                                          |                                            |                  |                                            |                 |                                            |                  |                                            |                 |
| Deterministic/Compartmental <sup>1,2,4-9,11,13-16</sup>                               | 56 (49;63)                                 | 42 (32;52)       | 93 (91;96)                                 | 85 (79;90)      | 37 (27;48)                                 | 27 (15;38)       | 64 (49;79)                                 | 52 (35;69)      |
| Stochastic/Individual-based <sup>3,10,12</sup>                                        | 60 (45;74)                                 | 49 (29;69)       | 95 (90;100)                                | 89 (77;100)     | 54 (30;78)                                 | 47 (20;74)       | 83 (48;100)                                | 80 (40;100)     |
|                                                                                       | <i>p</i> =0.67                             | <i>p</i> =0.55   | <i>p</i> =0.55                             | <i>p</i> =0.57  | <i>p</i> =0.23                             | <i>p</i> =0.19   | <i>p</i> =0.33                             | <i>p</i> =0.23  |
| <b>Model stratified by sexual activity group</b>                                      |                                            |                  |                                            |                 |                                            |                  |                                            |                 |
| Yes <sup>1-5,7-9,11-13,15,16</sup>                                                    | 52 (47;57)                                 | 37 (30;43)       | 93 (91;95)                                 | 83 (78;88)      | 34 (27;41)                                 | 22 (16;29)       | 61 (48;74)                                 | 49 (34;63)      |
| No <sup>6,10,14</sup>                                                                 | 78 (68;87)                                 | 72 (58;85)       | 98 (94;100)                                | 95 (85;100)     | 74 (58;90)                                 | 71 (56;86)       | 99 (69;100)                                | 100 (66;100)    |
|                                                                                       | <i>p</i> =0.0002                           | <i>p</i> =0.0002 | <i>p</i> =0.04                             | <i>p</i> =0.06  | <i>p</i> =0.0005                           | <i>p</i> <0.0001 | <i>p</i> =0.04                             | <i>p</i> =0.02  |
| <b>Probability of transmission</b>                                                    |                                            |                  |                                            |                 |                                            |                  |                                            |                 |
| Per partnership <sup>1,2,4,5,7-9,11,14-16</sup>                                       | 54 (47;61)                                 | 39 (29;49)       | 93 (90;95)                                 | 84 (78;89)      | 37 (26;48)                                 | 26 (14;37)       | 62 (47;78)                                 | 50 (32;67)      |
| Per act <sup>3,10,12,13</sup>                                                         | 62 (50;74)                                 | 52 (35;69)       | 96 (92;100)                                | 91 (82;100)     | 50 (30;70)                                 | 45 (23;66)       | 82 (54;100)                                | 78 (47;100)     |
| Other <sup>6</sup>                                                                    | 67 (43;91)                                 | 56 (23;89)       | 94 (86;100)                                | 85 (66;100)     | NA                                         | NA               | NA                                         | NA              |
|                                                                                       | <i>p</i> =0.41                             | <i>p</i> =0.33   | <i>p</i> =0.36                             | <i>p</i> =0.39  | <i>p</i> =0.26                             | <i>p</i> =0.15   | <i>p</i> =0.25                             | <i>p</i> =0.14  |
| <b>Natural immunity among women</b>                                                   |                                            |                  |                                            |                 |                                            |                  |                                            |                 |
| Low: ≤35% or ≤10yrs <sup>1,10,13,14</sup>                                             | 70 (60;81)                                 | 63 (49;77)       | 98 (94;100)                                | 94 (85;100)     | 50 (33;67)                                 | 47 (30;64)       | 73 (48;98)                                 | 71 (42;99)      |
| High: >35% and >10yrs <sup>2-9,11,12,15,16</sup>                                      | 52 (46;58)                                 | 37 (29;45)       | 92 (90;95)                                 | 83 (78;88)      | 35 (24;47)                                 | 22 (11;34)       | 64 (47;81)                                 | 50 (31;69)      |
|                                                                                       | <i>p</i> =0.008                            | <i>p</i> =0.005  | <i>p</i> =0.03                             | <i>p</i> =0.05  | <i>p</i> =0.16                             | <i>p</i> =0.03   | <i>p</i> =0.55                             | <i>p</i> =0.26  |
| <b>Natural history of cervical cancer included</b>                                    |                                            |                  |                                            |                 |                                            |                  |                                            |                 |
| Yes <sup>2-5,7-11,13-15</sup>                                                         | 58 (50;65)                                 | 45 (35;55)       | 94 (92;97)                                 | 88 (83;93)      | 43 (33;53)                                 | 34 (23;45)       | 72 (59;86)                                 | 63 (48;79)      |
| No <sup>1,6,12,16</sup>                                                               | 55 (42;67)                                 | 39 (21;57)       | 92 (88;96)                                 | 77 (69;88)      | 21 (0;44)                                  | 9 (0;35)         | 36 (5;67)                                  | 19 (0;55)       |
|                                                                                       | <i>p</i> =0.70                             | <i>p</i> =0.58   | <i>p</i> =0.28                             | <i>p</i> =0.10  | <i>p</i> =0.10                             | <i>p</i> =0.10   | <i>p</i> =0.05                             | <i>p</i> =0.04  |
| <b>Potential conflict of interests</b>                                                |                                            |                  |                                            |                 |                                            |                  |                                            |                 |
| ≥ 1 author from industry <sup>8,14</sup>                                              | 78 (64;92)                                 | 73 (55;91)       | 96 (91;100)                                | 94 (81;100)     | 57 (35;79)                                 | 52 (28;75)       | 80 (46;100)                                | 72 (32;100)     |
| Declare potential conflict <sup>2,3,10,13,16</sup>                                    | 58 (49;67)                                 | 46 (35;58)       | 95 (91;99)                                 | 89 (81;97)      | 44 (30;58)                                 | 34 (19;49)       | 73 (51;94)                                 | 63 (37;88)      |
| No declared potential conflict <sup>1,4-7,9,11,12,15</sup>                            | 52 (45;58)                                 | 35 (26;44)       | 93 (89;95)                                 | 82 (76;88)      | 31 (18;44)                                 | 19 (5;33)        | 58 (38;77)                                 | 46 (23;69)      |
|                                                                                       | <i>p</i> =0.01                             | <i>p</i> =0.006  | <i>p</i> =0.37                             | <i>p</i> =0.20  | <i>p</i> =0.15                             | <i>p</i> =0.08   | <i>p</i> =0.44                             | <i>p</i> =0.47  |
| <b>Impact factor<sup>‡</sup></b>                                                      |                                            |                  |                                            |                 |                                            |                  |                                            |                 |
| IF > 5 <sup>2-6,8,11</sup>                                                            | 54 (44;63)                                 | 40 (27;53)       | 92 (89;95)                                 | 83 (75;90)      | 37 (23;52)                                 | 25 (9;42)        | 68 (47;89)                                 | 57 (32;81)      |
| IF ≤ 5 <sup>1,7,9,10,12-16</sup>                                                      | 60 (51;67)                                 | 46 (34;57)       | 95 (92;98)                                 | 88 (81;94)      | 42 (28;56)                                 | 34 (19;49)       | 66 (46;85)                                 | 56 (34;79)      |
|                                                                                       | <i>p</i> =0.43                             | <i>p</i> =0.53   | <i>p</i> =0.15                             | <i>p</i> =0.31  | <i>p</i> =0.65                             | <i>p</i> =0.46   | <i>p</i> =0.86                             | <i>p</i> =0.99  |
| <b>HPV16 prevalence young women (continuous variable)<sup>all, except 10,13</sup></b> |                                            |                  |                                            |                 |                                            |                  |                                            |                 |
|                                                                                       | -1.1 (-3.6;1.4)                            | -1.4 (-4.8;2.1)  | -0.6 (-1.3;0.2)                            | -1.3 (-3.1;0.4) | 3.1 (-1.7;7.9)                             | 2.3 (-3.3;7.8)   | 6.5 (0.0;12.9)                             | 6.3 (-1.5;14.1) |
|                                                                                       | <i>p</i> =0.40                             | <i>p</i> =0.44   | <i>p</i> =0.16                             | <i>p</i> =0.15  | <i>p</i> =0.22                             | <i>p</i> =0.43   | <i>p</i> =0.07                             | <i>p</i> =0.13  |

NA : not applicable; \*1 : Baussano, 2 : Bogaards, 3 : Brisson, 4 : Burger, 5 : Canfell, 6 : Chesson, 7 : De Blasio, 8 : Elbasha, 9 : Guzzetta, 10 : Jepsen, 11 : Jit, 12 : Matthijsse, 13 : Mikolajczyk, 14 : Tully, 15 : Turner, 16 : Vänskä. <sup>‡</sup>At least one author declared a potential conflict of interest (e.g., funding from industry); <sup>‡</sup>Highest impact factor.

## B) Girls&Boys vaccination

|                                                                                       | Base                                       |                 |                                            |                | 20 years                                   |                |                                            |                |
|---------------------------------------------------------------------------------------|--------------------------------------------|-----------------|--------------------------------------------|----------------|--------------------------------------------|----------------|--------------------------------------------|----------------|
|                                                                                       | 40%                                        |                 | 80%                                        |                | 40%                                        |                | 80%                                        |                |
|                                                                                       | Mean HPV16 RR <sub>prev</sub> , % (95% CI) |                 | Mean HPV16 RR <sub>prev</sub> , % (95% CI) |                | Mean HPV16 RR <sub>prev</sub> , % (95% CI) |                | Mean HPV16 RR <sub>prev</sub> , % (95% CI) |                |
|                                                                                       | <i>p-value</i>                             |                 | <i>p-value</i>                             |                | <i>p-value</i>                             |                | <i>p-value</i>                             |                |
|                                                                                       | Women                                      | Men             | Women                                      | Men            | Women                                      | Men            | Women                                      | Men            |
| <b>Model characteristics</b>                                                          |                                            |                 |                                            |                |                                            |                |                                            |                |
| Deterministic / Compartmental <sup>1,2,4-9,11,13,14</sup>                             | 73 (66;80)                                 | 73 (66;79)      | 99 (98;100)                                | 98 (98;100)    | 45 (32;58)                                 | 42 (28;55)     | 66 (49;84)                                 | 63 (44;81)     |
| Stochastic / Individual-based <sup>3,10,12</sup>                                      | 83 (70;96)                                 | 82 (70;95)      | 100 (98;100)                               | 100 (98;100)   | 76 (47;100)                                | 78 (47;100)    | 84 (46;100)                                | 87 (45;100)    |
|                                                                                       | <i>p=0.20</i>                              | <i>p=0.19</i>   | <i>p=0.33</i>                              | <i>p=0.53</i>  | <i>p=0.07</i>                              | <i>p=0.05</i>  | <i>p=0.41</i>                              | <i>p=0.31</i>  |
| <b>Model stratified by sexual activity group</b>                                      |                                            |                 |                                            |                |                                            |                |                                            |                |
| Yes <sup>1-5,7-9,11-13,14</sup>                                                       | 72 (67;78)                                 | 72 (67;78)      | 99 (98;100)                                | 99 (98;100)    | 45 (34;56)                                 | 43 (31;55)     | 67 (50;83)                                 | 64 (46;81)     |
| No <sup>6,10</sup>                                                                    | 91 (77;100)                                | 91 (78;100)     | 99 (97;100)                                | 99 (97;100)    | 100 (63;100)                               | 100 (60;100)   | 100 (47;100)                               | 100 (42;100)   |
|                                                                                       | <i>p=0.02</i>                              | <i>p=0.02</i>   | <i>p=0.87</i>                              | <i>p=0.76</i>  | <i>p=0.01</i>                              | <i>p=0.02</i>  | <i>p=0.25</i>                              | <i>p=0.25</i>  |
| <b>Probability of transmission</b>                                                    |                                            |                 |                                            |                |                                            |                |                                            |                |
| Per partnership <sup>1,2,4,5,7-9,11,14</sup>                                          | 69 (63;75)                                 | 69 (63;75)      | 99 (98;100)                                | 99 (98;100)    | 42 (29;55)                                 | 39 (25;52)     | 63 (45;80)                                 | 58 (40;77)     |
| Per act <sup>3,10,12,13</sup>                                                         | 86 (77;95)                                 | 86 (77;95)      | 100 (99;100)                               | 100 (99;100)   | 73 (51;96)                                 | 75 (52;98)     | 90 (60;100)                                | 91 (60;100)    |
| Other <sup>6</sup>                                                                    | 83 (64;100)                                | 83 (65;100)     | 98 (95;100)                                | 98 (95;100)    | *NA                                        | NA             | NA                                         | NA             |
|                                                                                       | <i>p=0.02</i>                              | <i>p=0.02</i>   | <i>p=0.30</i>                              | <i>p=0.33</i>  | <i>p=0.03</i>                              | <i>p=0.02</i>  | <i>p=0.14</i>                              | <i>p=0.10</i>  |
| <b>Natural immunity among women</b>                                                   |                                            |                 |                                            |                |                                            |                |                                            |                |
| Low: ≤35% or ≤10yrs <sup>1,10,13</sup>                                                | 87 (75;99)                                 | 87 (76;98)      | 100 (98;100)                               | 100 (99;100)   | 60 (33;86)                                 | 60 (32;88)     | 71 (38;100)                                | 71 (36;100)    |
| High: >35% and >10yrs <sup>2-9,11,12,14</sup>                                         | 72 (66;78)                                 | 71 (66;77)      | 99 (98;100)                                | 99 (98;100)    | 47 (31;62)                                 | 44 (27;60)     | 69 (50;88)                                 | 65 (45;85)     |
|                                                                                       | <i>p=0.04</i>                              | <i>p=0.03</i>   | <i>p=0.18</i>                              | <i>p=0.17</i>  | <i>p=0.42</i>                              | <i>p=0.33</i>  | <i>p=0.93</i>                              | <i>p=0.77</i>  |
| <b>Natural history of cervical cancer included</b>                                    |                                            |                 |                                            |                |                                            |                |                                            |                |
| Yes <sup>2-5,7-13</sup>                                                               | 77 (69;84)                                 | 77 (69;84)      | 99 (98;100)                                | 99 (98;100)    | 55 (41;68)                                 | 53 (39;67)     | 76 (60;91)                                 | 74 (58;90)     |
| No <sup>1,6,14</sup>                                                                  | 71 (59;83)                                 | 70 (59;81)      | 99 (98;100)                                | 99 (98;100)    | 25 (0;55)                                  | 20 (0;51)      | 37 (2;71)                                  | 29 (0;66)      |
|                                                                                       | <i>p=0.43</i>                              | <i>p=0.37</i>   | <i>p=0.82</i>                              | <i>p=0.85</i>  | <i>p=0.09</i>                              | <i>p=0.08</i>  | <i>p=0.06</i>                              | <i>p=0.04</i>  |
| <b>Potential conflict of interests</b>                                                |                                            |                 |                                            |                |                                            |                |                                            |                |
| ≥ 1 author from industry <sup>8</sup>                                                 | 65 (44;87)                                 | 61 (41;81)      | 96 (94;98)                                 | 96 (95;98)     | 39 (0;82)                                  | 23 (0;70)      | 68 (13;100)                                | 57 (0;100)     |
| Declared potential conflict <sup>2,3,10,13,14</sup>                                   | 82 (72;91)                                 | 82 (73;91)      | 100 (99;100)                               | 100 (99;100)   | 62 (42;81)                                 | 59 (38;80)     | 78 (54;100)                                | 74 (47;100)    |
| No declared potential conflict <sup>1,4-7,9,11,12</sup>                               | 72 (64;79)                                 | 72 (65;79)      | 99 (98;100)                                | 99 (98;100)    | 42 (24;60)                                 | 42 (23;61)     | 62 (40;84)                                 | 62 (37;86)     |
|                                                                                       | <i>p=0.22</i>                              | <i>p=0.13</i>   | <i>p=0.01</i>                              | <i>p=0.004</i> | <i>p=0.33</i>                              | <i>p=0.31</i>  | <i>p=0.64</i>                              | <i>p=0.77</i>  |
| <b>Impact factor<sup>‡</sup></b>                                                      |                                            |                 |                                            |                |                                            |                |                                            |                |
| IF > 5 <sup>2-6,8,11</sup>                                                            | 71 (62;79)                                 | 71 (63;79)      | 98 (97;99)                                 | 99 (98;99)     | 50 (30;69)                                 | 48 (27;68)     | 74 (51;97)                                 | 72 (47;97)     |
| IF ≤ 5 <sup>1,7,9,10,12,13,14</sup>                                                   | 79 (71;88)                                 | 79 (70;87)      | 100 (99;100)                               | 100 (99;100)   | 50 (31;69)                                 | 48 (27;69)     | 65 (42;88)                                 | 61 (36;86)     |
|                                                                                       | <i>p=0.19</i>                              | <i>p=0.21</i>   | <i>p=0.02</i>                              | <i>p=0.04</i>  | <i>p=0.97</i>                              | <i>p=0.99</i>  | <i>p=0.60</i>                              | <i>p=0.54</i>  |
| <b>HPV16 prevalence young women (continuous variable)<sup>all, except 10,13</sup></b> |                                            |                 |                                            |                |                                            |                |                                            |                |
|                                                                                       | -2.0 (-4.7;0.7)                            | -1.2 (-3.8;1.5) | -0.1 (-0.5;0.3)                            | 0.0 (-0.3;0.4) | 4.7 (-0.5;9.8)                             | 6.1 (0.8;11.3) | 8.2 (1.3;15.1)                             | 9.3 (2.0;16.6) |
|                                                                                       | <i>p=0.16</i>                              | <i>p=0.39</i>   | <i>p=0.78</i>                              | <i>p=0.90</i>  | <i>p=0.10</i>                              | <i>p=0.04</i>  | <i>p=0.04</i>                              | <i>p=0.03</i>  |

NA : not applicable; \*1 : Baussano, 2 : Bogaards, 3 : Brisson, 4 : Burger, 5 : Canfell, 6 : Chesson, 7 : De Blasio, 8 : Elbasha, 9 : Guzzetta, 10 : Jepsen, 11 : Jit, 12 : Matthijsse, 13 : Mikolajczyk, 14 : Vänskä. <sup>‡</sup>At least one author declared a potential conflict of interest (e.g., funding from industry); <sup>‡</sup>Highest impact factor.

Figure S4. Pooled predictions of the relative reduction in HPV16 prevalence using 1) all models and 2) a subset of models that include sexual activity risk groups and assume natural immunity is moderate to high among women ( $\geq 35\%$  acquire natural immunity and immunity last more than 10 years) (main sources of heterogeneity identified in the meta-regression analysis – see table 2 in the main manuscript).

A) Girls-Only

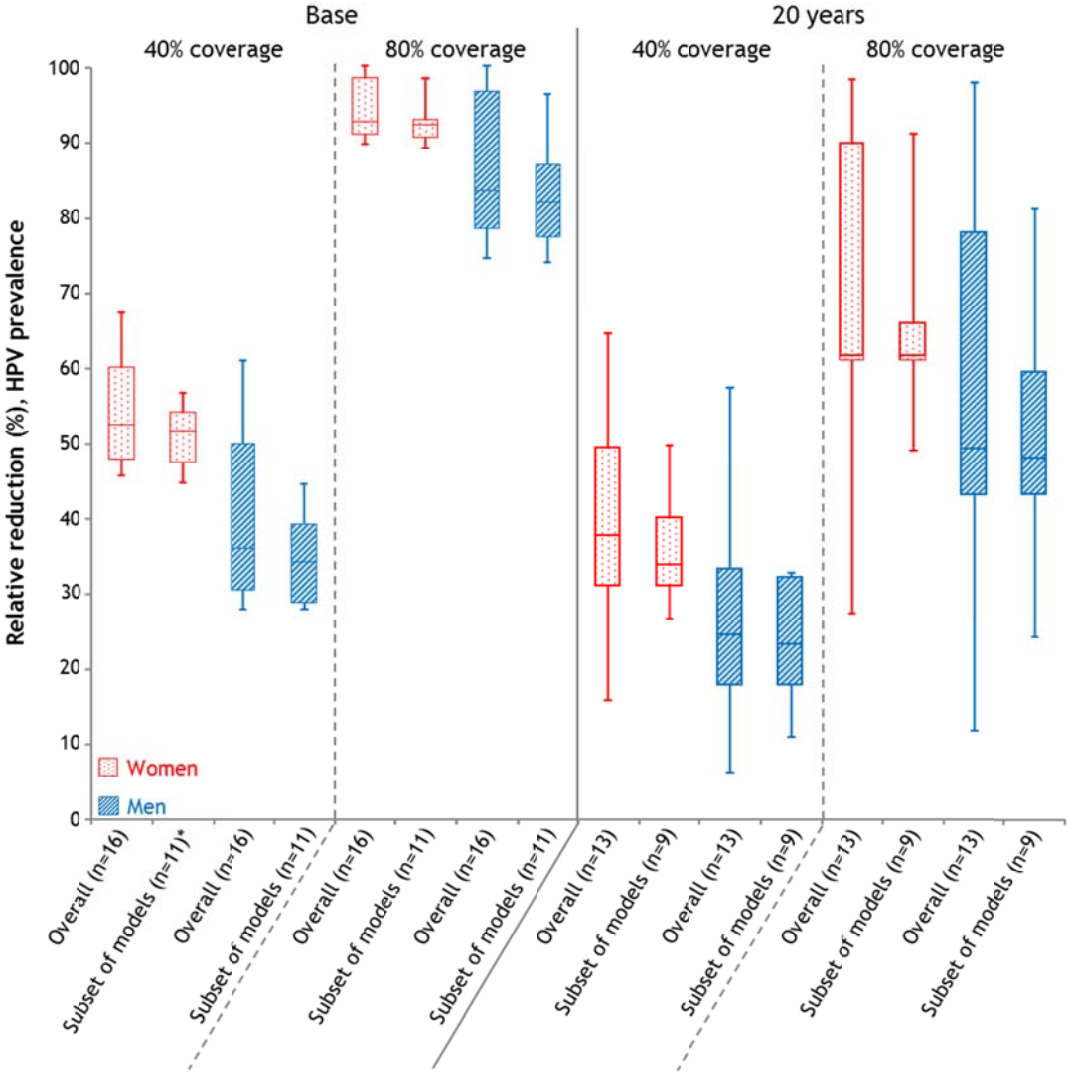

**B) Girls&Boys**

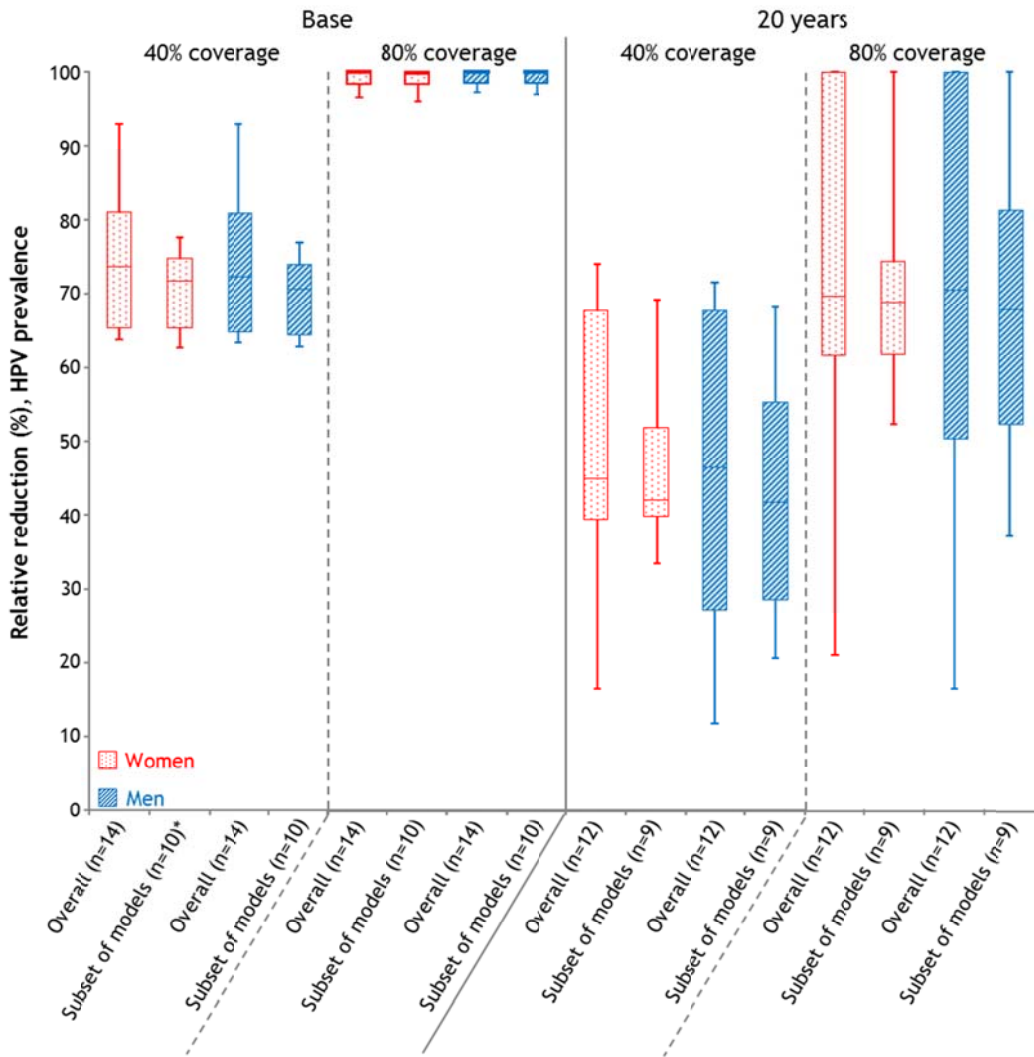

Girls-Only: Vaccination of girls only; Girls&Boys: Vaccination of girls and boys. The pooled estimates represent median and 10<sup>th</sup>, 25<sup>th</sup>, 75<sup>th</sup>, and 90<sup>th</sup> percentiles of the predictions of the models at 70 years after the introduction of vaccination. Base-case vaccine characteristics: Vaccine efficacy (VE)=100% and Duration of vaccine protection (VD)=Lifelong.

\* Subset of models that include sexual activity risk groups and assume natural immunity is moderate to high among women ( $\geq 35\%$  acquire natural immunity and immunity last more than 10 years)

## References

1. Baussano I, Dillner J, Lazzarato F, Ronco G, Franceschi S. Upscaling human papillomavirus vaccination in high-income countries: impact assessment based on transmission model. *Infect Agent Cancer* 2014; **9**(1): 4.
2. Baussano I, Elfstrom KM, Lazzarato F, et al. Type-specific human papillomavirus biological features: validated model-based estimates. *PLoS One* 2013; **8**(11): e81171.
3. Berkhof J, Bogaards JA. Vaccination against human papillomavirus types 16 and 18: The impact on cervical cancer. *Future Oncology* 2010; **6**(12): 1817-21.
4. Bogaards JA, Xiridou M, Coupe VM, Meijer CJ, Wallinga J, Berkhof J. Model-based estimation of viral transmissibility and infection-induced resistance from the age-dependent prevalence of infection for 14 high-risk types of human papillomavirus. *Am J Epidemiol* 2010; **171**(7): 817-25.
5. Bogaards JA, Coupe VM, Meijer CJ, Berkhof J. The clinical benefit and cost-effectiveness of human papillomavirus vaccination for adult women in the Netherlands. *Vaccine* 2011; **29**(48): 8929-36.
6. Bogaards JA, Coupe VM, Xiridou M, Meijer CJ, Wallinga J, Berkhof J. Long-term impact of human papillomavirus vaccination on infection rates, cervical abnormalities, and cancer incidence. *Epidemiology* 2011; **22**(4): 505-15.
7. Bogaards JA, Kretzschmar M, Xiridou M, Meijer CJ, Berkhof J, Wallinga J. Sex-specific immunization for sexually transmitted infections such as human papillomavirus: insights from mathematical models. *PLoS Med* 2011; **8**(12): e1001147.
8. Brisson M, van de Velde N, Franco EL, Drolet M, Boily MC. Incremental impact of adding boys to current human papillomavirus vaccination programs: role of herd immunity. *J Infect Dis* 2011; **204**(3): 372-6.
9. Brisson M, Van de Velde N, Boily MC. Different population-level vaccination effectiveness for HPV types 16, 18, 6 and 11. *Sex Transm Infect* 2011; **87**(1): 41-3.
10. Brisson M, Laprise JF, Drolet M, et al. Comparative cost-effectiveness of the quadrivalent and bivalent human papillomavirus vaccines: a transmission-dynamic modeling study. *Vaccine* 2013; **31**(37): 3863-71.
11. Drolet M, Laprise JF, Boily MC, Franco EL, Brisson M. Potential cost-effectiveness of the nonavalent human papillomavirus (HPV) vaccine. *Int J Cancer* 2014; **134**(9): 2264-8.
12. Malagon T, Joumier V, Boily MC, Van de Velde N, Drolet M, Brisson M. The impact of differential uptake of HPV vaccine by sexual risks on health inequalities: a model-based analysis. *Vaccine* 2013; **31**(13): 1740-7.
13. Van de Velde N, Brisson M, Boily MC. Understanding differences in predictions of HPV vaccine effectiveness: A comparative model-based analysis. *Vaccine* 2010; **28**(33): 5473-84.
14. Van de Velde N, Boily MC, Drolet M, et al. Population-level impact of the bivalent, quadrivalent, and nonavalent human papillomavirus vaccines: a model-based analysis. *J Natl Cancer Inst* 2012; **104**(22): 1712-23.
15. Kim JJ, Goldie SJ. Cost effectiveness analysis of including boys in a human papillomavirus vaccination programme in the United States. *BMJ* 2009; **339**: b3884.
16. Kim JJ, Ortendahl J, Goldie SJ. Cost-effectiveness of human papillomavirus vaccination and cervical cancer screening in women older than 30 years in the United States. *Ann Intern Med* 2009; **151**(8): 538-45.
17. Burger EA, Sy S, Nygard M, Kristiansen IS, Kim JJ. Prevention of HPV-related cancers in Norway: cost-effectiveness of expanding the HPV vaccination program to include pre-adolescent boys. *PLoS One* 2014; **9**(3): e89974.
18. Kim JJ. Targeted human papillomavirus vaccination of men who have sex with men in the USA: a cost-effectiveness modelling analysis. *Lancet Infect Dis* 2010; **10**(12): 845-52.
19. Burger EA, Ortendahl JD, Sy S, Kristiansen IS, Kim JJ. Cost-effectiveness of cervical cancer screening with primary human papillomavirus testing in Norway. *Br J Cancer* 2012; **106**(9): 1571-8.
20. Smith MA, Lew JB, Walker RJ, Brotherton JM, Nickson C, Canfell K. The predicted impact of HPV vaccination on male infections and male HPV-related cancers in Australia. *Vaccine* 2011; **29**(48): 9122-22.
21. Smith MA, Canfell K. Testing previous model predictions against new data on human papillomavirus vaccination program outcomes. *BMC research notes* 2014; **7**: 109.
22. Walker R, Nickson C, Lew JB, Smith M, Canfell K. A revision of sexual mixing matrices in models of sexually transmitted infection. *Stat Med* 2012; **31**(27): 3419-32.
23. Smith MA, Canfell K. Incremental benefits of male HPV vaccination: accounting for inequality in population uptake. *PLoS One* 2014; **9**(8): e101048.
24. Chesson HW, Ekwueme DU, Saraiya M, Dunne EF, Markowitz LE. The cost-effectiveness of male HPV vaccination in the United States. *Vaccine* 2011; **29**(46): 8443-50.
25. Chesson HW, Ekwueme DU, Saraiya M, Dunne EF, Markowitz LE. Estimates of the timing of reductions in genital warts and high grade cervical intraepithelial neoplasia after onset of human papillomavirus (HPV) vaccination in the United States. *Vaccine* 2013; **31**(37): 3899-905.
26. De Blasio BF, Neilson AR, Klemp M, Skjeldestad FE. Modeling the impact of screening policy and screening compliance on incidence and mortality of cervical cancer in the post-HPV vaccination era. *Journal of Public Health (United Kingdom)* 2012; **34**(4): 539-47.

27. Elbasha EH, Dasbach EJ. Impact of vaccinating boys and men against HPV in the United States. *Vaccine* 2010; **28**(42): 6858-67.
28. Elbasha EH, Dasbach EJ, Insinga RP, Haupt RM, Barr E. Age-based programs for vaccination against HPV. *Value Health* 2009; **12**(5): 697-707.
29. Guzzetta G, Faustini L, Panatto D, Gasparini R, Manfredi P. The impact of HPV female immunization in Italy: model based predictions. *PLoS One* 2014; **9**(3): e91698.
30. Usher C, Tilson L, Olsen J, Jepsen M, Walsh C, Barry M. Cost-effectiveness of human papillomavirus vaccine in reducing the risk of cervical cancer in Ireland due to HPV types 16 and 18 using a transmission dynamic model. *Vaccine* 2008; **26**(44): 5654-61.
31. Olsen J, Jepsen MR. Human papillomavirus transmission and cost-effectiveness of introducing quadrivalent HPV vaccination in Denmark. *Int J Technol Assess Health Care* 2010; **26**(2): 183-91.
32. Choi YH, Jit M, Gay N, Cox A, Garnett GP, Edmunds WJ. Transmission dynamic modelling of the impact of human papillomavirus vaccination in the United Kingdom. *Vaccine* 2010; **28**(24): 4091-102.
33. Jit M, Chapman R, Hughes O, Choi YH. Comparing bivalent and quadrivalent human papillomavirus vaccines: economic evaluation based on transmission model. *BMJ* 2011; **343**: d5775.
34. Jit M, Brisson M, Laprise JF, Choi YH. Comparison of two dose and three dose human papillomavirus vaccine schedules: cost effectiveness analysis based on transmission model. *BMJ* 2015; **350**: g7584.
35. Matthijsse SM, van Rosmalen J, Hontelez JA, et al. The role of acquired immunity in the spread of human papillomavirus (HPV): explorations with a microsimulation model. *PLoS One* 2015; **10**(2): e0116618.
36. Horn J, Damm O, Kretzschmar ME, et al. Estimating the long-term effects of HPV vaccination in Germany. *Vaccine* 2013; **31**(19): 2372-80.
37. Tully SP, Anonychuk AM, Sanchez DM, Galvani AP, Bauch CT. Time for change? An economic evaluation of integrated cervical screening and HPV immunization programs in Canada. *Vaccine* 2012; **30**(2): 425-35.
38. Turner HC, Baussano I, Garnett GP. Vaccinating Women Previously Exposed to Human Papillomavirus: A Cost-Effectiveness Analysis of the Bivalent Vaccine. *PLoS One* 2013; **8**(9).
39. Vanska S, Auranen K, Leino T, et al. Impact of vaccination on 14 high-risk HPV type infections: a mathematical modelling approach. *PLoS One* 2013; **8**(8): e72088.
